# Supplementary material for: Machine learning using longitudinal prescription and medical claims for the detection of non-alcoholic steatohepatitis (NASH)
Source: HighWire-hosted journal article supplement (doi:10.1136/bmjhci-2021-100510), 2022-03-01
Supplement: bmjhci-2021-100510supp001_data_supplement.pdf [file bmjhci-2021-100510supp001_data_supplement.pdf]

## Supplementary Material

### Machine learning using longitudinal prescription and medical claims for the detection of nonalcoholic steatohepatitis (NASH)

**Authors** Ozge Yasar<sup>1\*</sup>, Patrick Long<sup>2\*</sup>, Brett Harder<sup>2</sup>, Hanna Marshall<sup>2</sup>, Sanjay Bhasin<sup>2</sup>, Suyin Lee<sup>2</sup>, Mark Delegge<sup>3</sup>, Stephanie Roy<sup>2</sup>, Orla Doyle<sup>1</sup>, Nadea Leavitt<sup>2</sup>, John Rigg<sup>1</sup>

#### Author Affiliations

<sup>1</sup> Real World Solutions, IQVIA, London, United Kingdom, N1 9JY

<sup>2</sup> Real World Solutions, IQVIA, Plymouth Meeting, Pennsylvania, United States, 19462

<sup>3</sup> Therapeutic Center of Excellence, IQVIA, Durham, North Carolina, United States, 27703

\*Authors contributed equally

Corresponding Author:

Patrick Long, PhD

Real World Solutions, IQVIA

1 IMS Drive

Plymouth Meeting, PA, United States, 19462

Email: [patrick.long@us.imshealth.com](mailto:patrick.long@us.imshealth.com)

Tel: 1-215-317-6802

**TABLE OF CONTENTS**

**Supplementary Table 1.** Patient Cohort Inclusion and Exclusion Criteria

**Supplementary Table 2.** NASH Positive Patient Labeling Criteria for NASH Diagnosed and NASH Proxy Patients

**Supplementary Table 3.** List of Patient Demographic Features Included in NAFL Inclusive and non-NAFL Models

**Supplementary Table 4.** List of Data-Driven Clinical Concepts for Feature Engineering and Included in NAFL Inclusive and non-NAFL Models

**Supplementary Table 5.** List of Knowledge-Driven Clinical Concepts for Feature Engineering Included in the NAFL Inclusive and non-NAFL Models

**Supplementary Table 6.** XGBoost Hyperparameters for NAFL Inclusive and non-NAFL Models

**Supplementary Table 7.** List of NAFL and T2DM Clinical Codes Used for Model Benchmarking

**Supplementary Figure 1.** PR Curves for Recursive Feature Elimination

**Supplementary Figure 2.** PR Curves for Holdout and Validation Sets

**Supplementary Figure 3.** PR Curves for NASH Diagnosed versus NASH Proxy Patients

**Supplementary Table 1. Patient Cohort Inclusion and Exclusion Criteria.** Stratification criteria were applied over each 24-month cross-section lookback period preceding the cross-section index date.

| Variable                          | Application        | Source | Claim Code or Medication                                                                                                                                                                                                                                                                                                                                                                                                                                                                                                                           |
|-----------------------------------|--------------------|--------|----------------------------------------------------------------------------------------------------------------------------------------------------------------------------------------------------------------------------------------------------------------------------------------------------------------------------------------------------------------------------------------------------------------------------------------------------------------------------------------------------------------------------------------------------|
| Disqualifying Diagnoses           |                    |        |                                                                                                                                                                                                                                                                                                                                                                                                                                                                                                                                                    |
| Alcoholic Liver Disease           | Exclusion Criteria | ICD-10 | K70, K70.0, K70.1, K70.10, K70.11, K70.2, K70.3, K70.30, K70.31, K70.4, K70.40, K70.41, K70.9                                                                                                                                                                                                                                                                                                                                                                                                                                                      |
| Liver Disorders in Pregnancy      | Exclusion Criteria | ICD-10 | O26.6, O26.61, O26.611, O26.612, O26.613, O26.619, O26.62, O26.63                                                                                                                                                                                                                                                                                                                                                                                                                                                                                  |
| Primary Sclerosing Cholangitis    | Exclusion Criteria | ICD-10 | K83.01                                                                                                                                                                                                                                                                                                                                                                                                                                                                                                                                             |
| Hepatorenal Syndrome              | Exclusion Criteria | ICD-10 | K76.7                                                                                                                                                                                                                                                                                                                                                                                                                                                                                                                                              |
| Portal Hypertension               | Exclusion Criteria | ICD-10 | K76.6                                                                                                                                                                                                                                                                                                                                                                                                                                                                                                                                              |
| Primary Biliary Cirrhosis         | Exclusion Criteria | ICD-10 | K74.3                                                                                                                                                                                                                                                                                                                                                                                                                                                                                                                                              |
| Non-Alcoholic Liver Disease       | Exclusion Criteria | ICD-10 | K74.0, K74.1, K74.2, K74.60, K74.69                                                                                                                                                                                                                                                                                                                                                                                                                                                                                                                |
| Toxic Liver Disease               | Exclusion Criteria | ICD-10 | K71, K71.0, K71.1, K71.10, K71.11, K71.2, K71.3, K71.4, K71.5, K71.50, K71.51, K71.6, K71.7, K71.8, K71.9                                                                                                                                                                                                                                                                                                                                                                                                                                          |
| Spontaneous Bacterial Peritonitis | Exclusion Criteria | ICD-10 | K65.2                                                                                                                                                                                                                                                                                                                                                                                                                                                                                                                                              |
| Ascites                           | Exclusion Criteria | ICD-10 | R18, R18.0, R18.8                                                                                                                                                                                                                                                                                                                                                                                                                                                                                                                                  |
| Esophageal Varices                | Exclusion Criteria | ICD-10 | I85, I85.0, I85.00, I85.01, I85.1, I85.10, I85.11                                                                                                                                                                                                                                                                                                                                                                                                                                                                                                  |
| Alcohol Abuse                     | Exclusion Criteria | ICD-10 | F10, F10.1, F10.10, F10.11, F10.12, F10.120, F10.121, F10.129, F10.14, F10.15, F10.150, F10.151, F10.159, F10.18, F10.180, F10.181, F10.182, F10.188, F10.19, F10.2, F10.20, F10.21, F10.22, F10.220, F10.221, F10.229, F10.23, F10.230, F10.231, F10.232, F10.239, F10.24, F10.25, F10.250, F10.251, F10.259, F10.26, F10.27, F10.28, F10.280, F10.281, F10.282, F10.288, F10.29, F10.9, F10.92, F10.920, F10.921, F10.929, F10.94, F10.95, F10.950, F10.951, F10.959, F10.96, F10.97, F10.98, F10.980, F10.981, F10.982, F10.988, F10.99, Z71.41 |
| Alpha 1 Antitrypsin Deficiency    | Exclusion Criteria | ICD-10 | E88.01                                                                                                                                                                                                                                                                                                                                                                                                                                                                                                                                             |
| Hemochromatosis                   | Exclusion Criteria | ICD-10 | E83.11, E83.110, E83.111, E83.118, E83.119                                                                                                                                                                                                                                                                                                                                                                                                                                                                                                         |
| Wilson's                          | Exclusion Criteria | ICD-10 | E83.0, E83.00, E83.01, E83.09, H18.04, H18.041, H18.042, H18.043, H18.049                                                                                                                                                                                                                                                                                                                                                                                                                                                                          |
| Gaucher Disease                   | Exclusion Criteria | ICD-10 | E75.22                                                                                                                                                                                                                                                                                                                                                                                                                                                                                                                                             |
| Liver Cancers                     | Exclusion Criteria | ICD-10 | C22, C22.0, C22.1, C22.2, C22.3, C22.4, C22.7, C22.8, C22.9, C78.7, C7B.02, D01.5, D37.6, Z85.05                                                                                                                                                                                                                                                                                                                                                                                                                                                   |

|                                  |                    |            |                                                                                                                                                                                                                                                                                                                                                                                                                                                                                                                                                                                                                                                                                                                                                                                                                                        |
|----------------------------------|--------------------|------------|----------------------------------------------------------------------------------------------------------------------------------------------------------------------------------------------------------------------------------------------------------------------------------------------------------------------------------------------------------------------------------------------------------------------------------------------------------------------------------------------------------------------------------------------------------------------------------------------------------------------------------------------------------------------------------------------------------------------------------------------------------------------------------------------------------------------------------------|
| Hepatitis                        | Exclusion Criteria | ICD-10     | A51.45, B15.0, B15.9, B16, B16.0, B16.1, B16.2, B16.9, B17, B17.0, B17.1, B17.10, B17.11, B17.2, B17.8, B17.9, B18, B18.0, B18.1, B18.2, B18.8, B18.9, B19, B19.0, B19.1, B19.10, B19.11, B19.2, B19.20, B19.21, B19.9, B25.1, B26.81, B58.1, K73, K73.0, K73.1, K73.2, K73.8, K73.9, K75.4, K75.9, O98.4, O98.41, O98.411, O98.412, O98.413, O98.419, O98.42, O98.43                                                                                                                                                                                                                                                                                                                                                                                                                                                                  |
| Other Alcohol Related Conditions | Exclusion Criteria | ICD-10     | G62.1, G72.1, I42.6, K29.20, K29.21, O99.31, O99.310, O99.311, O99.312, O99.313, O99.314, O99.315                                                                                                                                                                                                                                                                                                                                                                                                                                                                                                                                                                                                                                                                                                                                      |
| Encephalopathy                   | Exclusion Criteria | ICD-10     | G32.89, G92, G93.4, G93.40, G93.41, G93.49, P91.81, P91.811, P91.819                                                                                                                                                                                                                                                                                                                                                                                                                                                                                                                                                                                                                                                                                                                                                                   |
| <b>Qualifying Treatments</b>     |                    |            |                                                                                                                                                                                                                                                                                                                                                                                                                                                                                                                                                                                                                                                                                                                                                                                                                                        |
| Glp 1 Receptor Agonists          | Inclusion Criteria | Medication | Byetta, Rybelsus, Trulicity, Victoza, Bydureon, Tanzeum, Bydureon Pen, Adlyxin, Adlyxin Starter Pack, Bydureon Bcise, Ozempic, Saxenda                                                                                                                                                                                                                                                                                                                                                                                                                                                                                                                                                                                                                                                                                                 |
| Obesity                          | Inclusion Criteria | Medication | Methamphetamine HCl, Phentermine HCl, Phentride, Diethylpropion HCl, Phendimetrazine Tartrate, Diethylpropion HCl Er, Phentermine Hydrochloride, Bontril Pdm, Xenical, Didrex, Tenuate, Tenuate Dospan, Bontril Slow Release, Ionamin-30, Adipex-P, Bontril Sr, Ionamin, Diethylpropion HCl Cr, Benzphetamine HCl, Ionamin-15, Oby-Trim, Pro-Fast Sr, Pro-Fast Sa, Pro-Fast Hs, Desoxyn, Suprenza, Belviq, Qsymia, Regimex, Evekeo, Contrave, Saxenda, Lomaira, Belviq Xr, Diethylpropion Hydrochlor, Amphetamine Sulfate, Evekeo Odt                                                                                                                                                                                                                                                                                                  |
| Other Diabetes                   | Inclusion Criteria | Medication | Glipizide, Glimepiride, Jardiance, Metformin Hydrochloride E, Metformin Hydrochloride, Glipizide Er, Myxredlin, Pioglitazone Hydrochlorid, Pioglitazone HCl, Fiasp Penfill, Nateglinide, Glipizide/Metformin Hydro, Glyburide, Alogliptin, Segluromet, Insulin Lispro, Insulin Lispro Kwikpen, Qtern, Toujeo Solostar, Novolog Mix 70/30, Novolog Mix 70/30 Prefill, Admelog Solostar, Humalog Kwikpen, Novolog Penfill, Afrezza, Tresiba, Admelog, Novolin 70/30 Flexpen, Novolin 70/30 Flexpen Rel, Levemir, Humalog, Lantus Solostar, Novolog, Novolog Flexpen, Levemir Flextouch, Lantus, Glyburide/Metformin Hydro, Novolin 70/30, Humulin N, Novolin N, Novolin R, Glumetza, Toujeo Max Solostar, Xigduo Xr, Steglatro, Steglujan, Janumet Xr, Janumet, D-Care Dm2, Humalog Junior Kwikpen, Fiasp Flextouch, Fiasp, Pioglitazone |

|                      |                    |        | HCl/Metformin, Synjardy Xr, Prandin, Januvia, Invokamet Xr, Basaglar Kwikpen, Xultophy 100/3.6, Soliqua 100/33, Miglitol, Jentadueto Xr, Glyburide/Metformin HCl, Humulin R U-500 Kwikpen, Repaglinide, Alogliptin/Pioglitazone, Alogliptin/Metformin HCl, Repaglinide/Metformin Hyd, Glyxambi, Glucotrol XL, Pioglitazone HCl-Glimepir, Synjardy, Tresiba Flextouch, Acarbose, Riomet, Onglyza, Kombiglyze Xr, Symlinpen 120, Symlinpen 60, Farxiga, Avandia, Glipizide XL, Invokamet, Levemir Flexpen, Metformin HCl, Humulin 70/30 Kwikpen, Humulin N Kwikpen, Metformin HCl Er, Glyburide Micronized, Invokana, Oseni, Nesina, Kazano, Juvisync, Novolin N Relion, Novolin R Relion, Novolin 70/30 Relion, Tolazamide, Jentadueto, Actos, Actoplus Met, Humalog Mix 75/25, Appformin, Appformin-D, Avandamet, Novolog Mix 70-30 Flexpen, Avandaryl, Tradjenta, Humulin R, Glipizide/Metformin HCl, Humulin 70/30, Cycloset, Humalog Mix 50/50 Pen, Humalog Mix 75/25 Pen, Humalog Mix 75/25 Kwikpen, Humalog Mix 50/50 Kwikpen, Precose, Actoplus Met Xr, Fortamet, Humalog Mix 50/50, Novolin 70-30, Apidra Solostar, Prandimet, Symlin, Glucovance, Humalog Pen, Humulin 50/50, Lantus for Opticlik, Duetact, Glyset, Amaryl, Apidra, Glucophage Xr, Metaglip, Starlix, Novolin R U-100, Chlorpropamide, Relion R, Relion N, Relion 70/30, Glucophage, Relion N Innolet, Relion 70/30 Innolet, Glycron, Diabeta, Tolinase, Glucotrol, Tolbutamide, Glynase, Novolin N U-100, Diabinese, Humulin R U-500 (Concentr, Humulin N U-100 Pen, Humulin 70/30 Pen |
|----------------------|--------------------|--------|-----------------------------------------------------------------------------------------------------------------------------------------------------------------------------------------------------------------------------------------------------------------------------------------------------------------------------------------------------------------------------------------------------------------------------------------------------------------------------------------------------------------------------------------------------------------------------------------------------------------------------------------------------------------------------------------------------------------------------------------------------------------------------------------------------------------------------------------------------------------------------------------------------------------------------------------------------------------------------------------------------------------------------------------------------------------------------------------------------------------------------------------------------------------------------------------------------------------------------------------------------------------------------------------------------------------------------------------------------------------------------------------------------------------------------------------------------------------------------------------------------------------------------------------------------------------|
| Qualifying Diagnoses |                    |        |                                                                                                                                                                                                                                                                                                                                                                                                                                                                                                                                                                                                                                                                                                                                                                                                                                                                                                                                                                                                                                                                                                                                                                                                                                                                                                                                                                                                                                                                                                                                                                 |
| Type 2 Diabetes      | Inclusion Criteria | ICD-10 | E11, E11.0, E11.00, E11.01, E11.1, E11.10, E11.11, E11.2, E11.21, E11.22, E11.29, E11.3, E11.31, E11.311, E11.319, E11.32, E11.321, E11.3211, E11.3212, E11.3213, E11.3219, E11.329, E11.3291, E11.3292, E11.3293, E11.3299, E11.33, E11.331, E11.3311, E11.3312, E11.3313, E11.3319, E11.339, E11.3391, E11.3392, E11.3393, E11.3399, E11.34, E11.341, E11.3411, E11.3412, E11.3413, E11.3419, E11.349, E11.3491, E11.3492, E11.3493, E11.3499, E11.35, E11.351, E11.3511,                                                                                                                                                                                                                                                                                                                                                                                                                                                                                                                                                                                                                                                                                                                                                                                                                                                                                                                                                                                                                                                                                     |

|                       |                    |        |                                                                                                                                                                                                                                                                                                                                                                                                                                                                                                                                                                                                        |
|-----------------------|--------------------|--------|--------------------------------------------------------------------------------------------------------------------------------------------------------------------------------------------------------------------------------------------------------------------------------------------------------------------------------------------------------------------------------------------------------------------------------------------------------------------------------------------------------------------------------------------------------------------------------------------------------|
|                       |                    |        | E11.3512, E11.3513, E11.3519, E11.352, E11.3521, E11.3522, E11.3523, E11.3529, E11.353, E11.3531, E11.3532, E11.3533, E11.3539, E11.354, E11.3541, E11.3542, E11.3543, E11.3549, E11.355, E11.3551, E11.3552, E11.3553, E11.3559, E11.359, E11.3591, E11.3592, E11.3593, E11.3599, E11.36, E11.37, E11.37X1, E11.37X2, E11.37X3, E11.37X9, E11.39, E11.4, E11.40, E11.41, E11.42, E11.43, E11.44, E11.49, E11.5, E11.51, E11.52, E11.59, E11.6, E11.61, E11.610, E11.618, E11.62, E11.620, E11.621, E11.622, E11.628, E11.63, E11.630, E11.638, E11.64, E11.641, E11.649, E11.65, E11.69, E11.8, E11.9 |
| Metabolic Syndrome    | Inclusion Criteria | ICD-10 | E88.81                                                                                                                                                                                                                                                                                                                                                                                                                                                                                                                                                                                                 |
| Obesity               | Inclusion Criteria | ICD-10 | E66, E66.0, E66.01, E66.09, E66.1, E66.2, E66.3, E66.8, E66.9, K95, K95.0, K95.01, K95.09, K95.8, K95.81, K95.89, O99.21, O99.210, O99.211, O99.212, O99.213, O99.214, O99.215, O99.840, O99.841, O99.842, O99.843, O99.844, O99.845, Z46.51, Z46.59, Z68.25, Z68.26, Z68.27, Z68.28, Z68.29, Z68.3, Z68.30, Z68.31, Z68.32, Z68.33, Z68.34, Z68.35, Z68.36, Z68.37, Z68.38, Z68.39, Z68.4, Z68.41, Z68.42, Z68.43, Z68.44, Z68.45, Z68.54, Z98.84                                                                                                                                                     |
| Qualifying Procedures |                    |        |                                                                                                                                                                                                                                                                                                                                                                                                                                                                                                                                                                                                        |
| Other Diabetes        | Inclusion Criteria | HCPC   | A4224, A4225, A4230, A4231, A4232, A9274, E0784, J1815, J1817, S5550, S5551, S5552, S5553, S5560, S5561, S5565, S5566, S5570, S5571, S8490, S9145, S9353                                                                                                                                                                                                                                                                                                                                                                                                                                               |
| Obesity               | Inclusion Criteria | HCPC   | S0160                                                                                                                                                                                                                                                                                                                                                                                                                                                                                                                                                                                                  |

**Supplementary Table 2. NASH Positive Patient Labeling Criteria for NASH Diagnosed and NASH Proxy Patients**

| Variable                                             | Application             | Source | Claim                               |
|------------------------------------------------------|-------------------------|--------|-------------------------------------|
| Diagnoses Codes Used for NASH Labeling               |                         |        |                                     |
| NASH                                                 | NASH Diagnosed Criteria | ICD-10 | K75.81                              |
| Non-Alcoholic Liver Fibrosis, Sclerosis or Cirrhosis | NASH Proxy Criteria     | ICD-10 | K74.0, K74.1, K74.2, K74.60, K74.69 |
| NAFL                                                 | NASH Proxy Criteria     | ICD-10 | K76.0                               |

**Supplementary Table 3. List of Patient Demographic Features Included in NAFL Inclusive and non-NAFL Models**

| Variable | Feature Representation             |
|----------|------------------------------------|
| Age      | Continuous (in years)              |
| Sex      | Categorical (female = 0, male = 1) |

**Supplementary Table 4. List of Data-Driven Clinical Concepts for Feature Engineering and Included in NAFL Inclusive and non- NAFL Models.** Features are represented as continuous variables in units of total claims or visits over the 24-month cross-section lookback period and as date differences in days between a first and final occurrence relative to the cross-section index date and as the total days between first and final occurrences.

| Variable                                                 | NAFL Inclusive Model | Non-NAFL Model | Source     | Claim Code or Medication |
|----------------------------------------------------------|----------------------|----------------|------------|--------------------------|
| <b>Provider Specialties for Visits and Prescriptions</b> |                      |                |            |                          |
| Family Medicine                                          | YES                  | YES            | Visit      | Any Claim                |
| Medical Oncology                                         | YES                  | YES            | Visit      | Any Claim                |
| Psychology                                               | YES                  | YES            | Visit      | Any Claim                |
| Rheumatology                                             | YES                  | YES            | Visit      | Any Claim                |
| Otolaryngology                                           | YES                  | NO             | Visit      | Any Claim                |
| Urology                                                  | YES                  | YES            | Visit      | Any Claim                |
| Dermatology                                              | YES                  | YES            | Visit      | Any Claim                |
| Pulmonary Disease                                        | YES                  | NO             | Visit      | Any Claim                |
| Podiatrist                                               | YES                  | YES            | Visit      | Any Claim                |
| Hematology/Oncology                                      | YES                  | YES            | Visit      | Any Claim                |
| Orthopedic Surgery                                       | YES                  | YES            | Visit      | Any Claim                |
| Ophthalmology                                            | YES                  | YES            | Visit      | Any Claim                |
| Neuroradiology                                           | YES                  | NO             | Visit      | Any Claim                |
| General Surgery                                          | YES                  | YES            | Visit      | Any Claim                |
| Nephrology                                               | YES                  | YES            | Visit      | Any Claim                |
| Anesthesiology                                           | YES                  | YES            | Visit      | Any Claim                |
| Anatomic/Clinical Pathology                              | YES                  | YES            | Visit      | Any Claim                |
| Physician Assistant                                      | YES                  | YES            | Visit      | Any Claim                |
| Emergency Medicine                                       | YES                  | YES            | Visit      | Any Claim                |
| Cardiovascular Disease                                   | YES                  | YES            | Visit      | Any Claim                |
| Nurse Practitioner                                       | YES                  | YES            | Visit      | Any Claim                |
| Internal Medicine                                        | YES                  | YES            | Visit      | Any Claim                |
| Diagnostic Radiology                                     | YES                  | YES            | Visit      | Any Claim                |
| Gastroenterology                                         | YES                  | YES            | Visit      | Any Claim                |
| Endocrinology, Diabetes & Metabolism                     | NO                   | YES            | Visit      | Any Claim                |
| Hematology (Pathology)                                   | NO                   | YES            | Visit      | Any Claim                |
| Infectious Disease                                       | NO                   | YES            | Visit      | Any Claim                |
| Internal Medicine/Pediatrics                             | NO                   | YES            | Prescriber | Any Claim                |
| Dentist                                                  | YES                  | YES            | Prescriber | Any Claim                |
| Obstetrics & Gynecology                                  | YES                  | YES            | Prescriber | Any Claim                |
| <b>Diagnoses</b>                                         |                      |                |            |                          |
| Cardiac Murmur, Unspecified                              | YES                  | NO             | ICD-10     | R01.1                    |
| Type 2 Diabetes Mellitus without Complications           | YES                  | YES            | ICD-10     | E11.9                    |

|                                                             |     |     |        |         |
|-------------------------------------------------------------|-----|-----|--------|---------|
| Nicotine Dependence, Unspecified, Uncomplicated             | NO  | YES | ICD-10 | F17.200 |
| Presence of Intraocular Lens                                | NO  | YES | ICD-10 | Z96.1   |
| Other Melanin Hyperpigmentation                             | NO  | YES | ICD-10 | L81.4   |
| Impaired Fasting Glucose                                    | NO  | YES | ICD-10 | R73.01  |
| Insomnia, Unspecified                                       | NO  | YES | ICD-10 | G47.00  |
| Other Abnormal Glucose                                      | NO  | YES | ICD-10 | R73.09  |
| Dry Eye Syndrome of Bilateral Lacrimal Glands               | NO  | YES | ICD-10 | H04.123 |
| Other Forms of Dyspnea                                      | NO  | YES | ICD-10 | R06.09  |
| Pure Hyperglyceridemia                                      | NO  | YES | ICD-10 | E78.1   |
| Hyperglycemia, Unspecified                                  | NO  | YES | ICD-10 | R73.9   |
| Unspecified Chronic Gastritis without Bleeding              | NO  | YES | ICD-10 | K29.50  |
| Pure Hypercholesterolemia, Unspecified                      | NO  | YES | ICD-10 | E78.00  |
| Calculus of Kidney                                          | NO  | YES | ICD-10 | N20.0   |
| Type 2 Diabetes Mellitus with Diabetic Polyneuropathy       | NO  | YES | ICD-10 | E11.42  |
| Acute Bronchitis, Unspecified                               | NO  | YES | ICD-10 | J20.9   |
| Long Term (Current) Use of Insulin                          | NO  | YES | ICD-10 | Z79.4   |
| Other Fatigue                                               | NO  | YES | ICD-10 | R53.83  |
| Encounter for Other Preprocedural Examination               | NO  | YES | ICD-10 | Z01.818 |
| Diarrhea, Unspecified                                       | NO  | YES | ICD-10 | R19.7   |
| Low Back Pain                                               | NO  | YES | ICD-10 | M54.5   |
| Encounter for Gyn Exam (General) (Routine) W/O Abn Findings | YES | NO  | ICD-10 | Z01.419 |
| Essential (Primary) Hypertension                            | YES | YES | ICD-10 | I10     |
| Body Mass Index [Bmi] 28.0-28.9, Adult                      | YES | YES | ICD-10 | Z68.28  |
| Morbid (Severe) Obesity Due To Excess Calories              | YES | YES | ICD-10 | E66.01  |
| Nausea                                                      | YES | NO  | ICD-10 | R11.0   |
| Urinary Tract Infection, Site Not Specified                 | YES | NO  | ICD-10 | N39.0   |



|                                                                |     |     |        |         |
|----------------------------------------------------------------|-----|-----|--------|---------|
| Encounter for Screening for Malignant Neoplasm of Colon        | YES | YES | ICD-10 | Z12.11  |
| Vitamin D Deficiency, Unspecified                              | YES | YES | ICD-10 | E55.9   |
| Hypothyroidism, Unspecified                                    | YES | YES | ICD-10 | E03.9   |
| Right Upper Quadrant Pain                                      | YES | YES | ICD-10 | R10.11  |
| Obesity, Unspecified                                           | YES | YES | ICD-10 | E66.9   |
| Other Long Term (Current) Drug Therapy                         | YES | NO  | ICD-10 | Z79.899 |
| Mixed Hyperlipidemia                                           | YES | YES | ICD-10 | E78.2   |
| Cough                                                          | YES | YES | ICD-10 | R05     |
| Chest Pain, Unspecified                                        | YES | YES | ICD-10 | R07.9   |
| Abnormal Results of Liver Function Studies                     | YES | YES | ICD-10 | R94.5   |
| Shortness of Breath                                            | YES | YES | ICD-10 | R06.02  |
| Encounter Screen Mammogram for Malignant Neoplasm of Breast    | YES | YES | ICD-10 | Z12.31  |
| Encounter for Immunization                                     | YES | YES | ICD-10 | Z23     |
| Type 2 Diabetes Mellitus with Hyperglycemia                    | YES | YES | ICD-10 | E11.65  |
| Unspecified Abdominal Pain                                     | YES | NO  | ICD-10 | R10.9   |
| Hyperlipidemia, Unspecified                                    | YES | YES | ICD-10 | E78.5   |
| Other Specified Abnormal Findings of Blood Chemistry           | YES | YES | ICD-10 | R79.89  |
| Elevated White Blood Cell Count, Unspecified                   | YES | NO  | ICD-10 | D72.829 |
| Type 2 Diabetes Mellitus W Diabetic Chronic Kidney Disease     | YES | NO  | ICD-10 | E11.22  |
| Abnormal Levels of Other Serum Enzymes                         | YES | YES | ICD-10 | R74.8   |
| Anemia, Unspecified                                            | YES | YES | ICD-10 | D64.9   |
| Headache                                                       | YES | NO  | ICD-10 | R51     |
| Encounter for General Adult Medical Exam W/O Abnormal Findings | YES | YES | ICD-10 | Z00.00  |
| Anxiety Disorder, Unspecified                                  | YES | NO  | ICD-10 | F41.9   |
| Venous Insufficiency (Chronic) (Peripheral)                    | YES | YES | ICD-10 | I87.2   |
| Body Mass Index [Bmi] 50.0-59.9, Adult                         | YES | YES | ICD-10 | Z68.43  |
| Other Obesity Due To Excess Calories                           | YES | YES | ICD-10 | E66.09  |

|                                                              |     |     |        |         |
|--------------------------------------------------------------|-----|-----|--------|---------|
| Body Mass Index [Bmi] 27.0-27.9, Adult                       | YES | YES | ICD-10 | Z68.27  |
| Body Mass Index [Bmi] 26.0-26.9, Adult                       | YES | YES | ICD-10 | Z68.26  |
| Pain in Thoracic Spine                                       | YES | NO  | ICD-10 | M54.6   |
| Body Mass Index [Bmi] 25.0-25.9, Adult                       | YES | YES | ICD-10 | Z68.25  |
| Encounter for General Adult Medical Exam W Abnormal Findings | YES | YES | ICD-10 | Z00.01  |
| Presbyopia                                                   | YES | YES | ICD-10 | H52.4   |
| Other Seborrheic Keratosis                                   | YES | YES | ICD-10 | L82.1   |
| Cardiomegaly                                                 | YES | NO  | ICD-10 | I51.7   |
| Type 2 Diabetes Mellitus with Other Specified Complication   | YES | YES | ICD-10 | E11.69  |
| Fibromyalgia                                                 | YES | YES | ICD-10 | M79.7   |
| Personal History of Nicotine Dependence                      | YES | NO  | ICD-10 | Z87.891 |
| Body Mass Index [Bmi]40.0-44.9, Adult                        | YES | YES | ICD-10 | Z68.41  |
| Iron Deficiency Anemia, Unspecified                          | YES | NO  | ICD-10 | D50.9   |
| Diaphragmatic Hernia without Obstruction or Gangrene         | YES | YES | ICD-10 | K44.9   |
| Cyst of Kidney, Acquired                                     | YES | NO  | ICD-10 | N28.1   |
| Dorsalgia, Unspecified                                       | YES | NO  | ICD-10 | M54.9   |
| Pain in Right Knee                                           | YES | NO  | ICD-10 | M25.561 |
| Gastro-Esophageal Reflux Disease with Esophagitis            | YES | YES | ICD-10 | K21.0   |
| Gastro-Esophageal Reflux Disease without Esophagitis         | YES | YES | ICD-10 | K21.9   |
| Inflamed Seborrheic Keratosis                                | YES | YES | ICD-10 | L82.0   |
| <b>Medications</b>                                           |     |     |        |         |
| Bile Acid Sequestrants                                       | YES | YES | GPI6   | 391000  |
| Nonsteroidal Anti-Inflammatory Agents (NSAIDs)               | YES | YES | GPI6   | 661000  |
| Vitamin D                                                    | YES | YES | GPI6   | 772020  |
| Antitussive - Nonnarcotic                                    | YES | NO  | GPI6   | 431020  |
| Anti-Infective Misc. - Combinations                          | YES | YES | GPI6   | 169900  |
| Angiotensin II Receptor Antagonists                          | YES | YES | GPI6   | 361500  |

|                                                      |     |     |      |        |
|------------------------------------------------------|-----|-----|------|--------|
| Incretin Mimetic Agents (Glp-1 Receptor Agonists)    | YES | YES | GPI6 | 271700 |
| Sulfonylureas                                        | YES | YES | GPI6 | 272000 |
| Hmg Coa Reductase Inhibitors                         | YES | YES | GPI6 | 394000 |
| Potassium                                            | YES | YES | GPI6 | 797000 |
| Proton Pump Inhibitors                               | YES | YES | GPI6 | 492700 |
| Triazoles                                            | YES | YES | GPI6 | 114070 |
| Ace Inhibitors                                       | YES | YES | GPI6 | 361000 |
| Aminopenicillins                                     | YES | YES | GPI6 | 12000  |
| Opioid Combinations                                  | YES | YES | GPI6 | 659900 |
| Antispasmodics                                       | YES | NO  | GPI6 | 491030 |
| Antihistamines - Non-Sedating                        | YES | NO  | GPI6 | 415500 |
| Fibric Acid Derivatives                              | YES | YES | GPI6 | 392000 |
| Adrenergic Combinations                              | YES | YES | GPI6 | 442099 |
| Tricyclic Agents                                     | YES | YES | GPI6 | 582000 |
| Thiazides & Thiazide-Like Diuretics                  | YES | YES | GPI6 | 376000 |
| Serotonin-Norepinephrine Reuptake Inhibitors (SNRIS) | YES | YES | GPI6 | 581800 |
| Beta Blockers Cardio-Selective                       | YES | YES | GPI6 | 332000 |
| Potassium Sparing Diuretics                          | YES | YES | GPI6 | 375000 |
| Tetracyclines                                        | YES | YES | GPI6 | 40000  |
| Diagnostic Tests                                     | YES | YES | GPI6 | 941000 |
| Fluoroquinolones                                     | YES | YES | GPI6 | 50000  |
| Anticonvulsants - Misc.                              | YES | YES | GPI6 | 726000 |
| Glucose Monitoring Test Supplies                     | YES | YES | GPI6 | 972020 |
| Opioid Agonists                                      | YES | YES | GPI6 | 651000 |
| Glucocorticosteroids                                 | YES | YES | GPI6 | 221000 |
| Beta Adrenergics                                     | YES | YES | GPI6 | 442010 |
| Central Muscle Relaxants                             | YES | YES | GPI6 | 751000 |
| 5-Ht3 Receptor Antagonists                           | YES | YES | GPI6 | 502500 |
| Corticosteroids - Topical                            | YES | YES | GPI6 | 905500 |
| Hydrocodone Combinations                             | YES | YES | GPI6 | 659917 |
| Needles & Syringes                                   | YES | YES | GPI6 | 970510 |
| Azithromycin                                         | YES | YES | GPI6 | 34000  |
| Loop Diuretics                                       | YES | YES | GPI6 | 372000 |
| Nasal Steroids                                       | YES | YES | GPI6 | 422000 |

|                                                 |     |     |          |        |
|-------------------------------------------------|-----|-----|----------|--------|
| Selective Serotonin Reuptake Inhibitors (SSRIs) | YES | YES | GPI6     | 581600 |
| Penicillin Combinations                         | YES | YES | GPI6     | 19900  |
| Human Insulin                                   | YES | YES | GPI6     | 271040 |
| Benzodiazepines                                 | YES | NO  | GPI6     | 571000 |
| Imidazole-Related Antifungals - Topical         | YES | YES | GPI6     | 901540 |
| Antibiotics - Topical                           | YES | NO  | GPI6     | 901000 |
| Laxatives - Miscellaneous                       | YES | YES | GPI6     | 466000 |
| Antimetabolites                                 | YES | YES | GPI6     | 213000 |
| Viral Vaccines                                  | NO  | YES | GPI6     | 171000 |
| Antihistamines - Phenothiazines                 | YES | YES | GPI6     | 414000 |
| Anti-Infective Agents - Misc.                   | YES | YES | GPI6     | 160000 |
| Gout Agents                                     | YES | YES | GPI6     | 680000 |
| Low Molecular Weight Heparins                   | YES | NO  | GPI6     | 831010 |
| Direct Factor XA Inhibitors                     | YES | YES | GPI6     | 833700 |
| Antimalarials                                   | YES | NO  | GPI6     | 130000 |
| Anorexiant Non-Amphetamine                      | YES | YES | GPI6     | 612000 |
| Surfactant Laxatives                            | YES | NO  | GPI6     | 465000 |
| Rosacea Agents                                  | YES | YES | GPI6     | 900600 |
| Salicylates                                     | YES | YES | GPI6     | 641000 |
| Antidepressants - Misc.                         | YES | YES | GPI6     | 583000 |
| Calcium Channel Blockers                        | YES | YES | GPI6     | 340000 |
| Beta Blockers Non-Selective                     | YES | YES | GPI6     | 331000 |
| Alpha 1-Adrenoceptor Antagonists                | NO  | YES | GPI6     | 568520 |
| Antiemetics - Anticholinergic                   | NO  | YES | GPI6     | 502000 |
| Ophthalmic Antibiotics                          | NO  | YES | GPI6     | 861010 |
| Antitussive-Expectorant                         | NO  | YES | GPI6     | 439970 |
| Antifungals - Topical                           | NO  | YES | GPI6     | 901500 |
| Urinary Anti-Infectives                         | YES | NO  | GPI6     | 530000 |
| <b>Procedures</b>                               |     |     |          |        |
| Assay of Phosphorus                             | NO  | YES | CPT/HCPC | 84100  |
| Methylprednisolone 40 Mg Injection              | NO  | YES | CPT/HCPC | J1030  |
| Tc99M Sestamibi                                 | NO  | YES | CPT/HCPC | A9500  |
| Rheumatoid Factor Quant                         | NO  | YES | CPT/HCPC | 86431  |
| Cardiovascular Stress Test                      | NO  | YES | CPT/HCPC | 93018  |

|                                |     |     |          |       |
|--------------------------------|-----|-----|----------|-------|
| Cardiovascular Stress Test     | NO  | YES | CPT/HCPC | 93017 |
| Eye Exam & Tx Estab Pt 1/>Vst  | NO  | YES | CPT/HCPC | 92014 |
| Us Exam Abdomal Complete       | NO  | YES | CPT/HCPC | 76700 |
| Iron Binding Test              | NO  | YES | CPT/HCPC | 83550 |
| Locm 300-399Mg/MI Iodine,1MI   | NO  | YES | CPT/HCPC | Q9967 |
| Hepatitis C Ab Test            | NO  | YES | CPT/HCPC | 86803 |
| Glucose Blood Test             | NO  | YES | CPT/HCPC | 82962 |
| C-Reactive Protein             | NO  | YES | CPT/HCPC | 86140 |
| Office Consultation            | NO  | YES | CPT/HCPC | 99244 |
| Cardiovascular Stress Test     | NO  | YES | CPT/HCPC | 93016 |
| Office Consultation            | NO  | YES | CPT/HCPC | 99243 |
| Nasal Application Device       | NO  | YES | CPT/HCPC | A7034 |
| Docrev Cur Meds by Elig Clin   | NO  | YES | CPT/HCPC | G8427 |
| Colonoscopy W/Lesion Removal   | NO  | YES | CPT/HCPC | 45385 |
| Breast Tomosynthesis Bi        | NO  | YES | CPT/HCPC | 77063 |
| Tubing with Heating Element    | NO  | YES | CPT/HCPC | A4604 |
| Cardiovascular Stress Test     | NO  | YES | CPT/HCPC | 93015 |
| Hep B Surface Antibody         | YES | YES | CPT/HCPC | 86706 |
| X-Ray Exam of Ankle            | YES | YES | CPT/HCPC | 73610 |
| Assay of Iron                  | YES | NO  | CPT/HCPC | 83540 |
| Emergency Dept Visit           | YES | YES | CPT/HCPC | 99285 |
| Emergency Dept Visit           | YES | YES | CPT/HCPC | 99284 |
| Emergency Dept Visit           | YES | YES | CPT/HCPC | 99283 |
| Urinalysis Auto W/Scope        | YES | YES | CPT/HCPC | 81001 |
| Chest X-Ray 2Vw Frontal & Latl | YES | YES | CPT/HCPC | 71020 |
| Electrocardiogram Report       | YES | YES | CPT/HCPC | 93010 |
| Egd Biopsy Single/Multiple     | YES | NO  | CPT/HCPC | 43239 |
| Assay of Urine Creatinine      | YES | YES | CPT/HCPC | 82570 |
| Vitamin D 25 Hydroxy           | YES | YES | CPT/HCPC | 82306 |
| Vitamin B-12                   | YES | YES | CPT/HCPC | 82607 |
| Ct Abd & Pelvic W/Contrast     | YES | YES | CPT/HCPC | 74177 |
| Assay of Lipase                | YES | NO  | CPT/HCPC | 83690 |
| Electrocardiogram Complete     | YES | YES | CPT/HCPC | 93000 |
| Antinuclear Antibodies         | YES | YES | CPT/HCPC | 86038 |

|                                 |     |     |          |       |
|---------------------------------|-----|-----|----------|-------|
| Urinalysis Auto W/O Scope       | YES | YES | CPT/HCPC | 81003 |
| Ur Albumin Quantitative         | YES | NO  | CPT/HCPC | 82043 |
| Assay of Ferritin               | YES | YES | CPT/HCPC | 82728 |
| Diagnostic Colonoscopy          | YES | NO  | CPT/HCPC | 45378 |
| Assay Thyroid Stim Hormone      | YES | YES | CPT/HCPC | 84443 |
| Comprehensive Metabolic Panel   | YES | YES | CPT/HCPC | 80053 |
| Complete CBC W/Auto Diff WBC    | YES | YES | CPT/HCPC | 85025 |
| Office/Outpatient Visit Est     | YES | YES | CPT/HCPC | 99214 |
| Office/Outpatient Visit Est     | YES | YES | CPT/HCPC | 99213 |
| Office/Outpatient Visit Est     | YES | YES | CPT/HCPC | 99215 |
| Office/Outpatient Visit Est     | YES | YES | CPT/HCPC | 99211 |
| Office/Outpatient Visit Est     | YES | YES | CPT/HCPC | 99212 |
| Glycosylated Hemoglobin Test    | YES | YES | CPT/HCPC | 83036 |
| Routine Venipuncture            | YES | YES | CPT/HCPC | 36415 |
| Office/Outpatient Visit New     | YES | YES | CPT/HCPC | 99204 |
| Office/Outpatient Visit New     | YES | YES | CPT/HCPC | 99203 |
| Office/Outpatient Visit New     | YES | YES | CPT/HCPC | 99202 |
| Office/Outpatient Visit New     | YES | YES | CPT/HCPC | 99205 |
| Lipid Panel                     | YES | YES | CPT/HCPC | 80061 |
| Tissue Exam by Pathologist      | YES | YES | CPT/HCPC | 88305 |
| Tte W/Doppler Complete          | YES | YES | CPT/HCPC | 93306 |
| Complete CBC Automated          | YES | YES | CPT/HCPC | 85027 |
| Immunization Admin              | YES | YES | CPT/HCPC | 90471 |
| Ther/Proph/Diag Injection Sc/Im | YES | YES | CPT/HCPC | 96372 |
| liv4 Vacc No Prsv 0.5 Ml Im     | YES | YES | CPT/HCPC | 90686 |
| Assay of Blood/Uric Acid        | YES | YES | CPT/HCPC | 84550 |
| X-Ray Exam of Foot              | YES | YES | CPT/HCPC | 73630 |
| Imag No Les                     | YES | NO  | CPT/HCPC | G9551 |
| Initial Hospital Care           | YES | YES | CPT/HCPC | 99223 |
| Initial Hospital Care           | YES | YES | CPT/HCPC | 99222 |
| Previous Visit Est Age 40-64    | YES | NO  | CPT/HCPC | 99396 |

|                                   |     |     |          |       |
|-----------------------------------|-----|-----|----------|-------|
| Bilirubin Direct                  | YES | NO  | CPT/HCPC | 82248 |
| Microbe Susceptible Mic           | YES | NO  | CPT/HCPC | 87186 |
| Airway Inhalation Treatment       | YES | NO  | CPT/HCPC | 94640 |
| Protein E-Phoresis Serum          | YES | NO  | CPT/HCPC | 84165 |
| Assay of Urea Nitrogen            | YES | NO  | CPT/HCPC | 84520 |
| Ground Mileage                    | YES | YES | CPT/HCPC | A0425 |
| Calc BMI Abv Up Param F/U         | YES | YES | CPT/HCPC | G8417 |
| Psych Diagnostic Evaluation       | YES | YES | CPT/HCPC | 90791 |
| Subsequent Hospital Care          | YES | YES | CPT/HCPC | 99233 |
| Subsequent Hospital Care          | YES | YES | CPT/HCPC | 99232 |
| Assay of Natriuretic Peptide      | YES | YES | CPT/HCPC | 83880 |
| Immunoassay Nonantibody           | YES | YES | CPT/HCPC | 83516 |
| Assay of Free Thyroxine           | YES | YES | CPT/HCPC | 84439 |
| Hepatitis B Surface Ag la         | YES | YES | CPT/HCPC | 87340 |
| Assay of Magnesium                | YES | YES | CPT/HCPC | 83735 |
| Ondansetron HCl Injection         | YES | NO  | CPT/HCPC | J2405 |
| Acute Hepatitis Panel             | YES | YES | CPT/HCPC | 80074 |
| Therapeutic Exercises             | YES | YES | CPT/HCPC | 97110 |
| Ct Abd & Pelvis W/O Contrast      | YES | NO  | CPT/HCPC | 74176 |
| Admin Influenza Virus Vac         | YES | NO  | CPT/HCPC | G0008 |
| Injection Midazolam Hydrochloride | YES | NO  | CPT/HCPC | J2250 |
| Assay of Folic Acid Serum         | YES | NO  | CPT/HCPC | 82746 |
| Chest X-Ray 1 View Frontal        | YES | YES | CPT/HCPC | 71010 |
| Assay of Ck (Cpk)                 | YES | YES | CPT/HCPC | 82550 |
| Hep B Core Antibody Total         | YES | YES | CPT/HCPC | 86704 |
| Pos Airway Pressure Tubing        | YES | NO  | CPT/HCPC | A7037 |
| Metabolic Panel Total Ca          | YES | YES | CPT/HCPC | 80048 |

**Supplementary Table 5. List of Knowledge-Driven Clinical Concepts for Feature Engineering Included in the Final NAFL Inclusive and non-NAFL Models.** Features are represented as continuous variables in units of total claims or visits over the 24-month cross-section lookback period and as date differences in days between a first and final occurrence relative to the cross-section index date and as the total days between first and final occurrences.

| Variable           | NAFL Inclusive Model | Non-NAFL Model | Source     | Claim Code or Medication                                                                                                                                                                                                                                                                                                                                                                                                                                                                                                                                                                                                                                                                                                                                                                                                                                                                                                                                                                                                                                                                                                                                                                                                                                                                                                                                                                                                                                                                                                                                                                                                                                                                                                                                                                                                                                                                                                                                                      |
|--------------------|----------------------|----------------|------------|-------------------------------------------------------------------------------------------------------------------------------------------------------------------------------------------------------------------------------------------------------------------------------------------------------------------------------------------------------------------------------------------------------------------------------------------------------------------------------------------------------------------------------------------------------------------------------------------------------------------------------------------------------------------------------------------------------------------------------------------------------------------------------------------------------------------------------------------------------------------------------------------------------------------------------------------------------------------------------------------------------------------------------------------------------------------------------------------------------------------------------------------------------------------------------------------------------------------------------------------------------------------------------------------------------------------------------------------------------------------------------------------------------------------------------------------------------------------------------------------------------------------------------------------------------------------------------------------------------------------------------------------------------------------------------------------------------------------------------------------------------------------------------------------------------------------------------------------------------------------------------------------------------------------------------------------------------------------------------|
| <b>Medications</b> |                      |                |            |                                                                                                                                                                                                                                                                                                                                                                                                                                                                                                                                                                                                                                                                                                                                                                                                                                                                                                                                                                                                                                                                                                                                                                                                                                                                                                                                                                                                                                                                                                                                                                                                                                                                                                                                                                                                                                                                                                                                                                               |
| Depression         | YES                  | YES            | Medication | Paroxetine Hydrochloride, Fluoxetine Hydrochloride, Bupropion Hydrochloride E, Venlafaxine Hydrochloride, Escitalopram Oxalate, Fluoxetine HCl, Olanzapine, Mirtazapine, Duloxetine Hydrochloride, Drizalma Sprinkle, Paxil Cr, Sertraline HCl, Amitriptyline HCl, Trazodone Hydrochloride, Amitriptyline Hydrochloride, Sertraline Hydrochloride, Duloxetine HCl, Doxepin Hydrochloride, Citalopram Hydrobromide, Nortriptyline HCl, Venlafaxine HCl Er, Aripiprazole, Bupropion Hydrochloride, Paroxetine HCl, Quetiapine Fumarate Er, Nortriptyline Hydrochloride, Venlafaxine HCl, Zulresso, Bupropion HCl, Desvenlafaxine Er, Olanzapine Odt, Imipramine Hydrochloride, Desipramine Hydrochloride, Trimipramine Maleate, Marplan, Tranylcypromine Sulfate, Spravato 84Mg Dose, Spravato 56Mg Dose, Paxil, Imipramine HCl, Aripiprazole Odt, Nefazodone Hydrochloride, Doxepin HCl, Abilify Mycite, Mirtazapine Odt, Trazodone HCl, Citalopram, Pexeva, Zolof, Forfivo XI, Desipramine HCl, Pristiq, Tofranil, Paroxetine HCl Er, Dermacinrx Dpn Pak, Bupropion HCl XI, Norpramin, Elavil, Trintellix, Bupropion HCl Sr, Parnate, Effexor Xr, Pramlyte, Emsam, Irenka, Rexulti, Viibryd Starter Pack, Cymbalta, Aplenzin, Abilify, Olanzapine/Fluoxetine, Nefazodone HCl, Khedezla, Bupropion HCl Er, Trazamine, Fetzima, Fetzima Titration Pack, Protriptyline HCl, Brintellix, Wellbutrin XI, Phenelzine Sulfate, Seroquel Xr, Lexapro, Viibryd, Amoxapine, Budeprion Sr, Budeprion XI, Gaboxetine, Sentravitl Pm-25, Appbutamone, Appbutamone-D, Sentroxatine, Sentraflox Am-10, Sentralopram Am-10, Zyprexa, Wellbutrin Sr, Fluoxetine Dr, Oleptro, Imipramine Pamoate, Zyprexa Zydis, Citalopram Hbr, Effexor, Rapiflux, Prozac, Chlordiazepoxide/Amitriptyl, Pamelor, Remeron Soltab, Remeron, Symbyax, Celexa, Surmontil, Vivactil, Nardil, Abilify Discmelt, Perphenazine/Amitriptylin, Desyrel, Wellbutrin, Prozac Weekly, Tofranil-Pm, Duo-Vil, Maprotiline HCl |
| Corticosteroids    | YES                  | YES            | Medication | Celestone, Betamethasone Sodium Phos, Betamethasone Sp, Uceris, Budesonide, Budesonide Er, Entocort Ec, Cortisone                                                                                                                                                                                                                                                                                                                                                                                                                                                                                                                                                                                                                                                                                                                                                                                                                                                                                                                                                                                                                                                                                                                                                                                                                                                                                                                                                                                                                                                                                                                                                                                                                                                                                                                                                                                                                                                             |



|  |  |  |  |                                                                                                                                                                                                                                                                                                                                                                                                                                                                                                                                                                                                                                                                                                                                                                                                                                                                                                                                                                                                                                                                                                                                                                                                                                                                                                                                                                                                                                                                                                                                                                                                                                                                                                                                                                                                                                                                                                                                                                                                                                                                                                                                                                                          |
|--|--|--|--|------------------------------------------------------------------------------------------------------------------------------------------------------------------------------------------------------------------------------------------------------------------------------------------------------------------------------------------------------------------------------------------------------------------------------------------------------------------------------------------------------------------------------------------------------------------------------------------------------------------------------------------------------------------------------------------------------------------------------------------------------------------------------------------------------------------------------------------------------------------------------------------------------------------------------------------------------------------------------------------------------------------------------------------------------------------------------------------------------------------------------------------------------------------------------------------------------------------------------------------------------------------------------------------------------------------------------------------------------------------------------------------------------------------------------------------------------------------------------------------------------------------------------------------------------------------------------------------------------------------------------------------------------------------------------------------------------------------------------------------------------------------------------------------------------------------------------------------------------------------------------------------------------------------------------------------------------------------------------------------------------------------------------------------------------------------------------------------------------------------------------------------------------------------------------------------|
|  |  |  |  | <p>Acetate, Emflaza, Zonacort 11 Day, Zonacort 7 Day, Dexamethasone, Zodex 12-Day, Zodex 6-Day, Zema-Pak 10 Day, Zema-Pak 13 Day, Zema-Pak 6 Day, Dexamethasone 10-Day Dose, Dexamethasone 13-Day Dose, Dexamethasone 6-Day Dose, Locort 11-Day, Locort 7-Day, Decadron, Taperdex 12-Day, Taperdex 6-Day, Taperdex 7-Day, Dexamethasone Intensol, Baycadron, Dexpak 10 Day, Dexpak 13 Day, Dexpak 6 Day, Hidex 6-Day, Dxevo 11-Day, Dex La 16, Dexamethasone (La), Dex La 8, Dexamethasone Sodium Phos, Readysharp Dexamethasone, Topidex, Doubledex, Dexonto 0.4%, Mas Care-Pak, Active Injection Kit D, Hydrocortisone, Cortef, Solu-Cortef, A-Hydrocort, Methylprednisolone Dose P, Methylprednisolone, Medrol Dosepak, Medrol, Methylprednisolone Acetat, P-Care D40, P-Care D80, Depo-Medrol, Methylprednisolone Pf, Readysharp Methylpredniso, Solu-Medrol, A-Methapred, Methylprednisolone Sodium, Prednisolone, Prelone, Millipred Dp, Millipred, Flo-Pred, Prednisolone Sodium Phosp, Pediapred, Veripred 20, Asmalpred, Orapred, Orapred Odt, Asmalpred Plus, Prednisone, Prednisone Intensol, Rayos, Deltasone, Aristocort, Readysharp Triamcinolone, Kenalog-40, Triamcinolone Acetonide, Kenalog-80, Zilretta, Kenalog-10, Triamcinolone, Arze-Ject-A, Pod-Care 100K, P-Care K80, P-Care K40, Triamcinolone Acetonide P, Pro-C-Dure 5 Kit, Pro-C-Dure 6 Kit, Triamcinolone Pf, Triamcinolone Diacetate, Aristospan Intra-Articula, Aristospan Intralesional, Readysharp Betamethasone, Betamethasone Acetate/Bet, Pod-Care 100C, Celestone-Soluspan, Betamethasone Combo, Beta 1 Kit, Dex Combo, Dexamethasone Acetate/Dex, Dmt Suik, Mardex-25, Active Injection Kit M-1, Dexamethasone/Sodium Phos, Lidocidex I, Dextrido, Active Injection Kit DI, Ropidex, Dexopin, P-Care D40G, P-Care D80G, Medroloan Suik, Medroloan Ii Suik, Physicians Ez Use M-Pred, Point of Care L.2, Point of Care L.5, Methylprednisolone/Lidoca, Multi-Specialty Kit, Dyural-L, Active Injection Kit L, Contrast Allergy Premed P, P-Care K80G, P-Care K40G, Pod-Care 100Kg, Triloan Ii Suik, Triloan Suik, Bupivillog Kit, Point of Care Km, Bt Injection Kit, Active Injection Kit Km,</p> |
|--|--|--|--|------------------------------------------------------------------------------------------------------------------------------------------------------------------------------------------------------------------------------------------------------------------------------------------------------------------------------------------------------------------------------------------------------------------------------------------------------------------------------------------------------------------------------------------------------------------------------------------------------------------------------------------------------------------------------------------------------------------------------------------------------------------------------------------------------------------------------------------------------------------------------------------------------------------------------------------------------------------------------------------------------------------------------------------------------------------------------------------------------------------------------------------------------------------------------------------------------------------------------------------------------------------------------------------------------------------------------------------------------------------------------------------------------------------------------------------------------------------------------------------------------------------------------------------------------------------------------------------------------------------------------------------------------------------------------------------------------------------------------------------------------------------------------------------------------------------------------------------------------------------------------------------------------------------------------------------------------------------------------------------------------------------------------------------------------------------------------------------------------------------------------------------------------------------------------------------|

|                         |     |     |            |                                                                                                                                                                                                                                                                                                                                                                                                                                                                                                                                                                                                                                                                                                                                                                                                                                                                                                                                                                                                      |
|-------------------------|-----|-----|------------|------------------------------------------------------------------------------------------------------------------------------------------------------------------------------------------------------------------------------------------------------------------------------------------------------------------------------------------------------------------------------------------------------------------------------------------------------------------------------------------------------------------------------------------------------------------------------------------------------------------------------------------------------------------------------------------------------------------------------------------------------------------------------------------------------------------------------------------------------------------------------------------------------------------------------------------------------------------------------------------------------|
|                         |     |     |            | Triamcinolone Acetonide/B, Triamcinolone/Lidocaine, Lidocilone I, Lidolog Kit, Lt Injection Kit, K10-Lido, K40-Lido, Betaloan Suik, Pod-Care 100Cg, Marbeta-25, Active Injection Kit Bm, Betalido, Beta Inject Kit, Active Injection Kit DIm, Dextido-M, Readysharp Anesthetics +, P-Care D80Mx, P-Care D40Mx, Dyural-Lm, Dyural-40, Dyural-80, Active Injection Kit Lm-D, Readysharp-P80, Readysharp-P40, Point of Care Lm Dep 2, Mlp A-2, Mlp A-1, P-Care K80Mx, P-Care K40Mx, Readysharp-K, Mlk F4 Kit, Mlk F3 Kit, Mlk F1 Kit, Pro-C-Dure 1 Kit, Pro-C-Dure 4 Kit, Pod-Care 100Kmx, Mlk F2 Kit, Pro-C-Dure 3 Kit, Pro-C-Dure 2 Kit, Interarticular Joint Kit, Active Injection Kit KI-3, Jtt Physicians Kit, Physicians Ez Use Joint T, Dermacinrx Cinlone-I Cpi, Marbeta-L, Active Injection Kit Blm-, Pod-Care 100Cmx, Medpredkit, Fludrocortisone Acetate                                                                                                                                     |
| Restless Leg Syndrome   | YES | NO  | Medication | Pramipexole Dihydrochlori, Ropinirole HCl, Ropinirole Hydrochloride, Horizant, Neupro, Requip, Mirapex                                                                                                                                                                                                                                                                                                                                                                                                                                                                                                                                                                                                                                                                                                                                                                                                                                                                                               |
| Glp 1 Receptor Agonists | YES | YES | Medication | Byetta, Rybelsus, Trulicity, Victoza, Bydureon, Tanzeum, Bydureon Pen, Adlyxin, Adlyxin Starter Pack, Bydureon Bcise, Ozempic, Saxenda                                                                                                                                                                                                                                                                                                                                                                                                                                                                                                                                                                                                                                                                                                                                                                                                                                                               |
| Hyperlipidemia          | YES | YES | Medication | Pravastatin Sodium, Rosuvastatin Calcium, Praluent, Ezetimibe, Fenofibrate, Atorvastatin Calcium, Colesevelam Hydrochloride, Lovastatin, Omega-3-Acid Ethyl Esters, Simvastatin, Niacin Er, Ezetimibe/Simvastatin, Omega-3 Rx Complete, Ezallor Sprinkle, Gemfibrozil, Fibracor, Fenofibric Acid, Niacin, Tricor, Fenofibrate Micronized, Repatha, Repatha Pushtronex System, Repatha Sureclick, Cholestyramine, Fenofibric Acid Dr, Fluvastatin Sodium Er, Cholestyramine Light, Niaspan, Zypitamag, Triglide, Niacor, Triklo, Flolipid, Kynamro, Trilipix, Altoprev, Zetia, Vascepa, Sure Result O3D3 System, Lovaza, Colestipol HCl, Juxtapid, Amlodipine Besylate/Atorv, Equapax/Atorvastatin Calc, Omega-3/D-3 Wellness Pack, Crestor, Welchol, Antara, Liptruzet, Livalo, Vytorin, Fenoglide, Lipitor, Juvisync, Fluvastatin, Questran Light, Questran, Advicor, Simcor, Prevalite, Lescol, Lipofen, Caduet, Lescol XI, Zocor, Pravachol, Colestid, Lofibra, Mevacor, Lopid, Colestid Flavored |
| Obesity                 | YES | NO  | Medication | Methamphetamine HCl, Phentermine HCl, Phentride, Diethylpropion HCl, Phendimetrazine Tartrate, Diethylpropion                                                                                                                                                                                                                                                                                                                                                                                                                                                                                                                                                                                                                                                                                                                                                                                                                                                                                        |

|                |     |     |            |                                                                                                                                                                                                                                                                                                                                                                                                                                                                                                                                                                                                                                                                                                                                                                                                                                                                                                                                                                                                                                                                                                                                                                                                                                                                                                                                                                                                                                                                                                                                                                                                                                                                                                                                                                                                                                         |
|----------------|-----|-----|------------|-----------------------------------------------------------------------------------------------------------------------------------------------------------------------------------------------------------------------------------------------------------------------------------------------------------------------------------------------------------------------------------------------------------------------------------------------------------------------------------------------------------------------------------------------------------------------------------------------------------------------------------------------------------------------------------------------------------------------------------------------------------------------------------------------------------------------------------------------------------------------------------------------------------------------------------------------------------------------------------------------------------------------------------------------------------------------------------------------------------------------------------------------------------------------------------------------------------------------------------------------------------------------------------------------------------------------------------------------------------------------------------------------------------------------------------------------------------------------------------------------------------------------------------------------------------------------------------------------------------------------------------------------------------------------------------------------------------------------------------------------------------------------------------------------------------------------------------------|
|                |     |     |            | HCl Er, Phentermine Hydrochloride, Bontril Pdm, Xenical, Didrex, Tenuate, Tenuate Dospan, Bontril Slow Release, Ionamin-30, Adipex-P, Bontril Sr, Ionamin, Diethylpropion HCl Cr, Benzphetamine HCl, Ionamin-15, Oby-Trim, Pro-Fast Sr, Pro-Fast Sa, Pro-Fast Hs, Desoxyn, Suprenza, Belviq, Qsymia, Regimex, Evekeo, Contrave, Saxenda, Lomaira, Belviq Xr, Diethylpropion Hydrochlor, Amphetamine Sulfate, Evekeo Odt                                                                                                                                                                                                                                                                                                                                                                                                                                                                                                                                                                                                                                                                                                                                                                                                                                                                                                                                                                                                                                                                                                                                                                                                                                                                                                                                                                                                                 |
| Other Diabetes | YES | YES | Medication | Glipizide, Glimepiride, Jardiance, Metformin Hydrochloride E, Metformin Hydrochloride, Glipizide Er, Myxredlin, Pioglitazone Hydrochlorid, Pioglitazone HCl, Fiasp Penfill, Nateglinide, Glipizide/Metformin Hydro, Glyburide, Alogliptin, Segluromet, Insulin Lispro, Insulin Lispro Kwikpen, Qtern, Toujeo Solostar, Novolog Mix 70/30, Novolog Mix 70/30 Prefill, Admelog Solostar, Humalog Kwikpen, Novolog Penfill, Afrezza, Tresiba, Admelog, Novolin 70/30 Flexpen, Novolin 70/30 Flexpen Rel, Levemir, Humalog, Lantus Solostar, Novolog, Novolog Flexpen, Levemir Flextouch, Lantus, Glyburide/Metformin Hydro, Novolin 70/30, Humulin N, Novolin N, Novolin R, Glumetza, Toujeo Max Solostar, Xigduo Xr, Steglatro, Steglujan, Janumet Xr, Janumet, D-Care Dm2, Humalog Junior Kwikpen, Fiasp Flextouch, Fiasp, Pioglitazone HCl/Metformi, Synjardy Xr, Prandin, Januvia, Invokamet Xr, Basaglar Kwikpen, Xultophy 100/3.6, Soliqua 100/33, Miglitol, Jentadueto Xr, Glyburide/Metformin HCl, Humulin R U-500 Kwikpen, Repaglinide, Alogliptin/Pioglitazone, Alogliptin/Metformin HCl, Repaglinide/Metformin Hyd, Glyxambi, Glucotrol XL, Pioglitazone HCl-Glimepir, Synjardy, Tresiba Flextouch, Acarbose, Riomet, Onglyza, Kombiglyze Xr, Symmlinpen 120, Symmlinpen 60, Farxiga, Avandia, Glipizide XL, Invokamet, Levemir Flexpen, Metformin HCl, Humulin 70/30 Kwikpen, Humulin N Kwikpen, Metformin HCl Er, Glyburide Micronized, Invokana, Oseni, Nesina, Kazano, Juvisync, Novolin N Relion, Novolin R Relion, Novolin 70/30 Relion, Tolazamide, Jentadueto, Actos, Actoplus Met, Humalog Mix 75/25, Appformin, Appformin-D, Avandamet, Novolog Mix 70-30 Flexpen, Avandaryl, Tradjenta, Humulin R, Glipizide/Metformin HCl, Humulin 70/30, Cycloset, Humalog Mix 50/50 Pen, Humalog Mix 75/25 Pen, Humalog Mix 75/25 |

|                        |     |     |            |                                                                                                                                                                                                                                                                                                                                                                                                                                                                                                                                                                                                                                                                                                                                                                                                                                                                                                                                                                                                                                                                                                                                                                                                                                                                                                                                                                                                                                                                                                                             |
|------------------------|-----|-----|------------|-----------------------------------------------------------------------------------------------------------------------------------------------------------------------------------------------------------------------------------------------------------------------------------------------------------------------------------------------------------------------------------------------------------------------------------------------------------------------------------------------------------------------------------------------------------------------------------------------------------------------------------------------------------------------------------------------------------------------------------------------------------------------------------------------------------------------------------------------------------------------------------------------------------------------------------------------------------------------------------------------------------------------------------------------------------------------------------------------------------------------------------------------------------------------------------------------------------------------------------------------------------------------------------------------------------------------------------------------------------------------------------------------------------------------------------------------------------------------------------------------------------------------------|
|                        |     |     |            | Kwikpen, Humalog Mix 50/50 Kwikpen, Precose, Actoplus Met Xr, Fortamet, Humalog Mix 50/50, Novolin 70-30, Apidra Solostar, Prandimet, Symlin, Glucovance, Humalog Pen, Humulin 50/50, Lantus for Opticlik, Duetact, Glyset, Amaryl, Apidra, Glucophage Xr, Metaglip, Starlix, Novolin R U-100, Chlorpropamide, Relion R, Relion N, Relion 70/30, Glucophage, Relion N Innolet, Relion 70/30 Innolet, Glycron, Diabeta, Tolinase, Glucotrol, Tolbutamide, Glynase, Novolin N U-100, Diabinese, Humulin R U-500 (Concentr, Humulin N U-100 Pen, Humulin 70/30 Pen                                                                                                                                                                                                                                                                                                                                                                                                                                                                                                                                                                                                                                                                                                                                                                                                                                                                                                                                                             |
| Tamoxifen              | YES | YES | Medication | Tamoxifen Citrate, Soltamox, Nolvadex                                                                                                                                                                                                                                                                                                                                                                                                                                                                                                                                                                                                                                                                                                                                                                                                                                                                                                                                                                                                                                                                                                                                                                                                                                                                                                                                                                                                                                                                                       |
| Metformin              | YES | YES | Medication | Metformin HCl, Metformin Hydrochloride, Metformin HCl Er, Fortamet, Metformin Hydrochloride E, Glumetza, Glucophage, Glucophage Xr, Riomet                                                                                                                                                                                                                                                                                                                                                                                                                                                                                                                                                                                                                                                                                                                                                                                                                                                                                                                                                                                                                                                                                                                                                                                                                                                                                                                                                                                  |
| Cardiovascular Related | YES | YES | Medication | Quinidine Gluconate, Reopro, Pronestyl, Cardene, Prazosin HCl, Prinzide, Hyzaar, Cozaar, Dyazide, Coreg, Cordarone, Corvert, Fragmin, Aldactone, Aldactazide, Calan, Calan Sr, Covera-Hs, Norpace Cr, Norpace, Adalat Cc, Aceon, Lasix, Trental, Inderal, Cardura, Furosemide, Propranolol HCl, Coumadin, Ascriptin Maximum Strength, Ascriptin, Norvasc, Procardia, Procardia XI, Minipress, Tikosyn, Nitrostat, Accupril, Bumetanide, Mannitol, Lovenox, Lozol, Diovan Hct, Diovan, Hyperstat Iv, Nitro-Dur, Integrilin, Avapro, Avalide, Nitroglycerin Transdermal, Dilatrate Sr, Verelan, Monoket, Univasc, Uniretic, Verelan Pm, Levatol, Enalapril Maleate, Captopril/Hydrochlorothia, Diltiazem HCl, Metoprolol Tartrate, Atenolol, Terazosin HCl, Nicardipine HCl, Nifedical XI, Nifediac Cc, Enalapril Maleate/Hydroch, Sotalol HCl, Disopyramide Phosphate, Diltiazem Hydrochloride E, Pentoxifylline Er, Doxazosin Mesylate, Mexiletine HCl, Amiodarone HCl, Quinidine Sulfate Er, Methazolamide, Goodsense Aspirin Adult L, Goodsense Aspirin, Captopril, Chlorothiazide, Isosorbide Mononitrate, Isosorbide Dinitrate, Hydrochlorothiazide, Guanabenz Acetate, Verapamil HCl Er, Labetalol Hydrochloride, Lanoxin, Lanoxin Pediatric, Trandate, Aspirin, Hydralazine HCl, Aspirin Ec, Reserpine, Bisoprolol Fumarate/Hydro, Bisoprolol Fumarate, Quinidine Sulfate, Nitroglycerin Cr, Papaverine HCl Cr, Nitroglycerin Sr, Atacand, Atacand Hct, Xylocaine, Toprol XL, Clonidine HCl, Clonidine Hydrochloride, |

|  |  |  |  |                                                                                                                                                                                                                                                                                                                                                                                                                                                                                                                                                                                                                                                                                                                                                                                                                                                                                                                                                                                                                                                                                                                                                                                                                                                                                                                                                                                                                                                                                                                                                                                                                                                                                                                                                                                                                                                                                                                                                                                                                                                                                                                                                                                                                                                                                                          |
|--|--|--|--|----------------------------------------------------------------------------------------------------------------------------------------------------------------------------------------------------------------------------------------------------------------------------------------------------------------------------------------------------------------------------------------------------------------------------------------------------------------------------------------------------------------------------------------------------------------------------------------------------------------------------------------------------------------------------------------------------------------------------------------------------------------------------------------------------------------------------------------------------------------------------------------------------------------------------------------------------------------------------------------------------------------------------------------------------------------------------------------------------------------------------------------------------------------------------------------------------------------------------------------------------------------------------------------------------------------------------------------------------------------------------------------------------------------------------------------------------------------------------------------------------------------------------------------------------------------------------------------------------------------------------------------------------------------------------------------------------------------------------------------------------------------------------------------------------------------------------------------------------------------------------------------------------------------------------------------------------------------------------------------------------------------------------------------------------------------------------------------------------------------------------------------------------------------------------------------------------------------------------------------------------------------------------------------------------------|
|  |  |  |  | <p>Nifedipine, Indapamide, Diltiazem Cd, Spironolactone, Sorine, Pentoxil, Pacerone, Acetazolamide, Zestril, Lidocaine HCl, Altace, Cardizem Cd, Lopressor, Lopressor Hct, Zestoretic, Isosorbide Dinitrate Er, Lidocaine HCl in D5W, Tenormin, Tenoretic 50, Tenoretic 100, Osmitrol Viaflex, Lidocaine HCl/Dextrose, Nitroglycerin in Dextrose, Clorpres, Nadolol, Pindolol, Timolol Maleate, Spironolactone/Hydrochlor, Methylothiazide, Propranolol Hydrochloride, Chlorthalidone, Propranolol/Hydrochloroth, Methyldopa, Nifedipine Er, Methyldopa/Hydrochlorothi, Verapamil HCl, Amiloride/Hydrochlorothia, Verapamil Hydrochloride, Guanfacine HCl, Acebutolol HCl, Triamterene/Hydrochloroth, Atenolol/Chlorthalidone, Terazosin Hydrochloride, Prazosin Hydrochloride, Diltiazem HCl Er, Digoxin, Hydralazine Hydrochloride, Isosorbide Dinitrate Sa, Verapamil HCl Sa, Tiazac, Adenocard, Papaverine HCl, Childrens Aspirin, Dipyridamole, Warfarin Sodium, Propafenone HCl, Verapamil HCl Sr, Quinidine Gluconate Sa, Minoxidil, Aggrenox, Catapres, Persantine, Catapres-Tts-3, Heparin Sodium, Nitroglycerin Td, Aspirin Ec Low Dose, Isoxsuprine HCl, Nitroglycerin Er, Tri-Buffered Aspirin, Diltiazem Xr, Aspir-Low, Brevibloc, Aspirin Childrens, Buffinol, Buffaprin, Aspercine Extra, Ra Aspirin, Ra Pain Relief Aspirin, Ra Aspirin Ec, Ra Aspirin Ec Maximum Str, Ra Aspirin Ec Adult Low S, Bayer Low Dose, Bayer Chewable Low Dose, Bayer Aspirin, Bayer Aspirin Regimen, Bayer Plus, Sb Aspirin Ec, Sb Low Dose Asa Ec, Sb Childrens Aspirin, Sb Aspirin, Pentoxifylline Cr, Gnp Adult Aspirin Low Str, Gnp Aspirin, Gnp Aspirin Low Dose, Quality Aspirin, Buffered Aspirin Extra St, Aspirin Low Dose, Buffered Aspirin, Aspirin Ec Lo-Dose, Amyl Nitrite, St Joseph Adult Analgesic, St Joseph Adult, Albertson'S Children'S As, Albertsons Enteric Coated, Albertsons Aspirin, Albertsons Buffered Aspir, Soba Analgesic, Eql Aspirin, Eql Aspirin Ec, Soba Aspirin Extra Streng, Eql Childrens Aspirin, Soba Enteric Coated Aspir, Eql Buffered Aspirin, Soba Aspirin, Meijer Aspirin Ec, Sm Aspirin, Sm Aspirin Enteric Coated, Sm Childrens Aspirin, Sm Aspirin Ec Low Strengt, Sm Aspirin Low Dose, Para-Time, Nitro-Time, Adult Aspirin Ec Low Stre, Amiloride HCl,</p> |
|--|--|--|--|----------------------------------------------------------------------------------------------------------------------------------------------------------------------------------------------------------------------------------------------------------------------------------------------------------------------------------------------------------------------------------------------------------------------------------------------------------------------------------------------------------------------------------------------------------------------------------------------------------------------------------------------------------------------------------------------------------------------------------------------------------------------------------------------------------------------------------------------------------------------------------------------------------------------------------------------------------------------------------------------------------------------------------------------------------------------------------------------------------------------------------------------------------------------------------------------------------------------------------------------------------------------------------------------------------------------------------------------------------------------------------------------------------------------------------------------------------------------------------------------------------------------------------------------------------------------------------------------------------------------------------------------------------------------------------------------------------------------------------------------------------------------------------------------------------------------------------------------------------------------------------------------------------------------------------------------------------------------------------------------------------------------------------------------------------------------------------------------------------------------------------------------------------------------------------------------------------------------------------------------------------------------------------------------------------|

|  |  |  |  |                                                                                                                                                                                                                                                                                                                                                                                                                                                                                                                                                                                                                                                                                                                                                                                                                                                                                                                                                                                                                                                                                                                                                                                                                                                                                                                                                                                                                                                                                                                                                                                                                                                                                                                                                                                                                                                                                                                                                                                                                                                                                                                                                                                                                                                                                                                                                                                                     |
|--|--|--|--|-----------------------------------------------------------------------------------------------------------------------------------------------------------------------------------------------------------------------------------------------------------------------------------------------------------------------------------------------------------------------------------------------------------------------------------------------------------------------------------------------------------------------------------------------------------------------------------------------------------------------------------------------------------------------------------------------------------------------------------------------------------------------------------------------------------------------------------------------------------------------------------------------------------------------------------------------------------------------------------------------------------------------------------------------------------------------------------------------------------------------------------------------------------------------------------------------------------------------------------------------------------------------------------------------------------------------------------------------------------------------------------------------------------------------------------------------------------------------------------------------------------------------------------------------------------------------------------------------------------------------------------------------------------------------------------------------------------------------------------------------------------------------------------------------------------------------------------------------------------------------------------------------------------------------------------------------------------------------------------------------------------------------------------------------------------------------------------------------------------------------------------------------------------------------------------------------------------------------------------------------------------------------------------------------------------------------------------------------------------------------------------------------------|
|  |  |  |  | <p>Metoprolol Succinate Er, Tnkase, Cathflo Activase, Activase, Betapace, Betapace Af, St Joseph Aspirin, Eq Aspirin Ec, Quinidine Gluconate Cr, Aspirtab, Aspirtab Maximum Strength, Vasotec, Maxzide, Corgard, Dilacor Xr, Microzide, Propranolol HCl Er, Aspirin Dr, Zaroxolyn, Retavase, Verapamil HCl Cr, Nitroglycerin, Lotrel, Plavix, Nitrolingual Pumpspray, Isosorbide Mononitrate Er, Teveten Hct, Catapres-Tts-2, Catapres-Tts-1, Cardizem, Inderal La, Maxzide-25, Prinivil, Procainamide HCl Er, Lotensin, Minitran, Nitro-Bid, Ismo, Carvedilol, Imdur, Papaverine HCl Er, Cardene Sr, Demadex, Ziac, Pletal, Labetalol HCl, Isoptin Sr, Vaseretic, Isosorbide Dinitrate Tr, Enalaprilat, Inamrinone, Phentolamine Mesylate, Acetazolamide Sodium, Halfprin, 1/2Halfprin, Diltiazem HCl Sr, Capoten, Flecainide Acetate, Hytrin, Procainamide HCl, Lisinopril, Dilt-Xr, Thalitone, Cartia Xt, Childrens Aspirin Low Str, Aspirin 81, Ecpirin, Heparin Sodium Dcu, Qc Aspirin, Pentopak, Dyrenium, Dynacirc Cr, Coated Aspirin, Gnp Childrens Aspirin, Corlopam, Eq Aspirin, Cvs Aspirin, Benicar, Tarka, Milrinone Lactate, Milrinone in Dextrose, Torsemide, Cvs Aspirin Ec, Cvs Childrens Aspirin, Cvs Aspirin Low Dose, Lisinopril/Hydrochlorothi, Accuretic, Digox, Introl, Zebeta, Isochron, Enteric Coated Aspirin, Teveten, Tambocor, Mavik, Cvs Aspirin Child, Qc Childrens Aspirin, Methyldopate HCl, Cardizem La, Kerlone, Innopran Xl, Taztia Xt, Afeditab Cr, Moexipril HCl, Zero-Order Release Aspi, Ra Childrens Aspirin, Ra Tri-Buffered Aspirin, Esmolol HCl, Diamox, Benicar Hct, Ra Aspirin Adult Low Stre, Sotalol HCl (Af), Sotalol HCl Af, Metolazone, Jantoven, Lotensin Hct, Betaxolol HCl, Inspra, Amlodipine Besylate, Qc Tri-Buffered Aspirin, Fosinopril Sodium, Ecotrin Maximum Strength, Ecotrin Regular Strength, Aspirin Enteric Coated Ad, Sm Aspirin Tri-Buffered, Benazepril HCl, Ecotrin Low Strength, Benazepril HCl/Hydrochlor, Benazepril Hydrochloride, Sm Aspirin Adult Low Stre, Caduet, Micardis Hct, Aspirin Adult Low Strengt, Adenosine, Dilt-Cd, Metoprolol/Hydrochlorothi, Cilostazol, Fenoldopam Mesylate, Micardis, Felodipine Er, Quinaretic, Quinidine Gluconate Er, Aspirin 81 Low Dose, Norwich Aspirin, Quinapril HCl, Quinapril Hydrochloride, Rythmol, Nitroglycerin in 5% Dextr, Nitropress, Bidil, Corzide, Fosinopril</p> |
|--|--|--|--|-----------------------------------------------------------------------------------------------------------------------------------------------------------------------------------------------------------------------------------------------------------------------------------------------------------------------------------------------------------------------------------------------------------------------------------------------------------------------------------------------------------------------------------------------------------------------------------------------------------------------------------------------------------------------------------------------------------------------------------------------------------------------------------------------------------------------------------------------------------------------------------------------------------------------------------------------------------------------------------------------------------------------------------------------------------------------------------------------------------------------------------------------------------------------------------------------------------------------------------------------------------------------------------------------------------------------------------------------------------------------------------------------------------------------------------------------------------------------------------------------------------------------------------------------------------------------------------------------------------------------------------------------------------------------------------------------------------------------------------------------------------------------------------------------------------------------------------------------------------------------------------------------------------------------------------------------------------------------------------------------------------------------------------------------------------------------------------------------------------------------------------------------------------------------------------------------------------------------------------------------------------------------------------------------------------------------------------------------------------------------------------------------------|

|  |  |  |  |                                                                                                                                                                                                                                                                                                                                                                                                                                                                                                                                                                                                                                                                                                                                                                                                                                                                                                                                                                                                                                                                                                                                                                                                                                                                                                                                                                                                                                                                                                                                                                                                                                                                                                                                                                                                                                                                                                                                                                                                                                                                                                                                                                                                                                                                                                            |
|--|--|--|--|------------------------------------------------------------------------------------------------------------------------------------------------------------------------------------------------------------------------------------------------------------------------------------------------------------------------------------------------------------------------------------------------------------------------------------------------------------------------------------------------------------------------------------------------------------------------------------------------------------------------------------------------------------------------------------------------------------------------------------------------------------------------------------------------------------------------------------------------------------------------------------------------------------------------------------------------------------------------------------------------------------------------------------------------------------------------------------------------------------------------------------------------------------------------------------------------------------------------------------------------------------------------------------------------------------------------------------------------------------------------------------------------------------------------------------------------------------------------------------------------------------------------------------------------------------------------------------------------------------------------------------------------------------------------------------------------------------------------------------------------------------------------------------------------------------------------------------------------------------------------------------------------------------------------------------------------------------------------------------------------------------------------------------------------------------------------------------------------------------------------------------------------------------------------------------------------------------------------------------------------------------------------------------------------------------|
|  |  |  |  | <p>Sodium/Hydroch, Eq Childrens Aspirin, Eq Adult Aspirin Low Stre, Eq Buffered Aspirin, Eq Aspirin Adult Low Dose, Eq Aspirin Low Dose, Isordil Titrados, Quinapril/Hydrochlorothia, Sodium Diuril, Ranexa, Isradipine, Lytensopril, Clopidogrel, Qc Aspirin Low Dose, Sotalol Hydrochloride, Sectral, Tenex, Cvs Aspirin Adult Low Str, Trandolapril, Coreg Cr, Tekturna, Moexipril/Hydrochlorothia, Lytensopril-90, Hypertensolol, Hctz/Triamterene, Amlodipine Besylate/Benaz, Exforge, Mm Aspirin, Nadolol/Bendroflumethiazi, Aspirin Low Strength, Azor, Anacin, Ramipril, Bystolic, Bufferin, Bufferin Extra Strength, Edecrin, Diuril, Tekturna Hct, Tgt Aspirin, Sular, Kinlytic, Aggrastat, Sodium Edecrin, Tgt Childrens Aspirin, Gnp Safety Coated Aspirin, Nisoldipine Er, Eplerenone, Cleviprex, Hypertenevide-12.5, Hypertenipine-2.5, Acetazolamide Er, Cardene I.V., Diltzac, Cardene Iv, Midamor, Tgt Aspirin Low Dose, Exforge Hct, Diltiazem Hydrochloride/D, Children'S Aspirin, Aspirin Buffered, Ethacrynic Acid, Cvs Aspirin Low Strength, Pentoxifylline, Propafenone Hydrochloride, Ecotrin, Adult Low Dose Aspirin Ec, Multaq, Effient, Rythmol Sr, Valturna, Px Enteric Aspirin, Chlorothiazide Sodium, Twynsta, Px Aspirin, Bayer Aspirin Ec Low Dose, Low Dose Aspirin Ec, Perindopril Erbumine, Retavase Half-Kit, Sotalol Hydrochloride, Ibutilide Fumarate, Nitromist, Matzim La, Bufferin Low Dose, Losartan Potassium/Hydroc, Losartan Potassium, Isoditrate Er, Nisoldipine, Trandolapril/Verapamil Hc, Neptazane, Enoxaparin Sodium, Tribenzor, Metoprolol Succinate, Tekamlo, Pradaxa, Nexiclon Xr, Propafenone HCl Er, Amturnide, Eql Aspirin Low Dose, Miniprin Low Dose, Eql Adult Aspirin Low Str, Diltiazem HCl-0.9% Nacl, Nitroglycerin Lingual, Edarbi, Amiodarone Hydrochloride/, Kls Aspirin Ec, Kls Aspirin Low Dose, Th Aspirin, Th Enteric Aspirin, Th Aspirin Low Dose, Nexterone, Xarelto, Brilinta, Cvs Buffered Aspirin, Ec-81 Aspirin, Lytensopril Kit, Ra Aspirin Adult Low Dose, Bayer Advanced Aspirin Ex, Amlodipine Besylate/Atorv, Eprosartan Mesylate, Cvs Aspirin Adult Low Dos, Dutoprol, Edarbyclor, Hm Aspirin Ec Low Dose, Hm Aspirin, Hm Aspirin Ec, Irbesartan/Hydrochlorothi, Irbesartan, Cvs Enteric Aspirin, St. Joseph Aspiri</p> |
|--|--|--|--|------------------------------------------------------------------------------------------------------------------------------------------------------------------------------------------------------------------------------------------------------------------------------------------------------------------------------------------------------------------------------------------------------------------------------------------------------------------------------------------------------------------------------------------------------------------------------------------------------------------------------------------------------------------------------------------------------------------------------------------------------------------------------------------------------------------------------------------------------------------------------------------------------------------------------------------------------------------------------------------------------------------------------------------------------------------------------------------------------------------------------------------------------------------------------------------------------------------------------------------------------------------------------------------------------------------------------------------------------------------------------------------------------------------------------------------------------------------------------------------------------------------------------------------------------------------------------------------------------------------------------------------------------------------------------------------------------------------------------------------------------------------------------------------------------------------------------------------------------------------------------------------------------------------------------------------------------------------------------------------------------------------------------------------------------------------------------------------------------------------------------------------------------------------------------------------------------------------------------------------------------------------------------------------------------------|

|                         |     |     |            |                                                                                                                                                                                                                                                                                                                                                                                                                                                                                                                                                                                                                                                                                                                                                                                                                                                                                                                                                                                                                                                                                                                    |
|-------------------------|-----|-----|------------|--------------------------------------------------------------------------------------------------------------------------------------------------------------------------------------------------------------------------------------------------------------------------------------------------------------------------------------------------------------------------------------------------------------------------------------------------------------------------------------------------------------------------------------------------------------------------------------------------------------------------------------------------------------------------------------------------------------------------------------------------------------------------------------------------------------------------------------------------------------------------------------------------------------------------------------------------------------------------------------------------------------------------------------------------------------------------------------------------------------------|
| Glitazones              | YES | YES | Medication | Pioglitazone Hydrochlorid, Pioglitazone HCl, Actos, Avandia                                                                                                                                                                                                                                                                                                                                                                                                                                                                                                                                                                                                                                                                                                                                                                                                                                                                                                                                                                                                                                                        |
| SglT2S                  | YES | YES | Medication | Invokana, Farxiga, Jardiance, Steglatro                                                                                                                                                                                                                                                                                                                                                                                                                                                                                                                                                                                                                                                                                                                                                                                                                                                                                                                                                                                                                                                                            |
| Omega 3 Fatty Acids     | YES | YES | Medication | Vascepa, Omega-3-Acid Ethyl Esters, Triklo, Lovaza                                                                                                                                                                                                                                                                                                                                                                                                                                                                                                                                                                                                                                                                                                                                                                                                                                                                                                                                                                                                                                                                 |
| Ursodiol                | YES | YES | Medication | Ursodiol, Actigall, Ursodiol/Syrspend Sf Ph4, Urso, Urso 250, Urso Forte                                                                                                                                                                                                                                                                                                                                                                                                                                                                                                                                                                                                                                                                                                                                                                                                                                                                                                                                                                                                                                           |
| Anti-Obesity Medication | YES | YES | Medication | Amphetamine Sulfate, Evekeo Odt, Evekeo, Methamphetamine HCl, Desoxyn, Benzphetamine HCl, Didrex, Regimex, Diethylpropion HCl, Diethylpropion HCl Er, Tenuate, Tenuate Dospan, Diethylpropion Hydrochlor, Diethylpropion HCl Cr, Phendimetrazine Tartrate, Bontril Slow Release, Bontril Pdm, Bontril Sr, Phentermine HCl, Phentride, Phentermine Hydrochloride, Adipex-P, Suprenza, Lomaira, Oby-Trim, Pro-Fast Hs, Pro-Fast Sa, Pro-Fast Sr, Ionamin-15, Ionamin-30, Ionamin, Diet Aid Caffeine Free, Ra Diet Aid Maximum Stren, Weight Down, Osco Appetite Control Max, Just One Per Day, Efed li, Sav-On Appetite Control M, Thinz Before Meals, Thinz-Span Tr, Thinz Drops, Thinz Back To Nature Tr, Dexatrim, Ayds, Hungrex Plus, Permathene, Ra Diet Aid/Vitamin C Max, Diet Aid/Vitamin C Extra, Qsymia, Extra Strength Grapefruit, Grapefruit Diet, Xenical, Alli, Belviq, Belviq Xr, Contrace                                                                                                                                                                                                            |
| Vitamin E               | YES | YES | Medication | Vitamin E, Pa Vitamin E, E-Oil, Vitamin E/DI-Alpha, Nature'S Glo Natural Vita, Formula E 400, Cvs E, Cvs E Oil, Key-E, Sm Vitamin E, Sm Vitamin E Blended, Alph-E, Alph-E-Mixed, Alph-E-Mixed 1000, Aqua-E, EqI Vitamin E, Vitamin E Complex Natural, Vitamin E High Potency, Vitamin E Mixed, YI Vitamin E, Cvs Vitamin E, Vitamin E Mtc, Vitamin E Natural, Vitamin Supplement E-1000, Vitamin Supplement E-400, Vitamin E Water Dispersib, Gnp Vitamin E, Vitamin E-200, Vitamin E-400, Vitamin E/D-Alpha, Gnp Vitamin E Natural, Gnp Vitamin E Water Dispe, Vitamin E/D-Alpha Natural, Vitamin E Blend, Vitamin E Complex, E1000, E200, E400, E400 Mixed, E600, Th Vitamin E, Th Vitamin E/D-Alpha, Ra Vitamin E, Vitamin E Water Solubiliz, Vitamin E Water Soluble, Ra Vitamin E Blend, Ra Vitamin E Natural, Albertsons Vitamin E, Albertsons Natural Vitami, Dry E-Synthetic, Ester-E, E-200, E-400, E-400-Clear, E-400-Mixed, E 1000, E 400 Blended, E-1000, E-Max-1000, Aquasol E, Aquavit-E, Aqueous Vitamin E, Nutr-E-Sol, Ra Natural Vitamin E, Vita-Plus E, Px Vitamin E, Natural Mixed Tocopherols, |



|                        |     |     |            |                                                                                                                                                                                                                                                                                                                                                                                                                                                                                                                                                                                                                                                                                                                           |
|------------------------|-----|-----|------------|---------------------------------------------------------------------------------------------------------------------------------------------------------------------------------------------------------------------------------------------------------------------------------------------------------------------------------------------------------------------------------------------------------------------------------------------------------------------------------------------------------------------------------------------------------------------------------------------------------------------------------------------------------------------------------------------------------------------------|
|                        |     |     |            | Liqui-E, Natural Vitamin E, Kp Vitamin E, Hm Vitamin E, Natural Blend E-400, E-Pherol, Qc Vitamin E, Soluvita E, Hm E Vitamin                                                                                                                                                                                                                                                                                                                                                                                                                                                                                                                                                                                             |
| Hypothyroidism         | YES | YES | Medication | Armour Thyroid, Thyroid, Levothyroxine Sodium, Synthroid, Cytomel, Levoxyl, Thyrolar-1/4, Thyrolar-1/2, Thyrolar-1, Thyrolar-2, Thyrolar-3, Nature Thyroid, Nature-Throid, Westhroid, Levothroid, Unithroid, Unithroid Direct, Liothyronine Sodium, Triostat, Tirosint, Np Thyroid 30, Np Thyroid 60, Np Thyroid 90, Nature-Throid Nt-2.5, Westhroid-P, Wp Thyroid, Np Thyroid, Np Thyroid 15, Levo-T, Levothyroxine/Liothyronin, Np Thyroid 120, Tirosint-Sol, Euthyrox                                                                                                                                                                                                                                                  |
| Insomnia               | NO  | YES | Medication | Ramelteon, Zolpidem Tartrate Er, Phenobarbital, Zolpidem Tartrate, Triazolam, Doral, Eszopiclone, Temazepam, Zaleplon, Lunesta, Pentobarbital Sodium, Quazepam, Estazolam, Zolpimist, Seconal Sodium, Ambien, Amytal Sodium, Belsomra, Rozerem, Flurazepam HCl, Intermezzo, Nembutal Sodium, Silenor, Ambien Cr, Gabazolpidem-5, Strazepam, Sentrazolpidem Pm-5, Sonata, Edluar, Restoril, Seconal, Phenobarbital Sodium, Halcion, Luminal, Nembutal, Prosom, Somnote, Butisol Sodium, Chloral Hydrate                                                                                                                                                                                                                    |
| Diagnoses              |     |     |            |                                                                                                                                                                                                                                                                                                                                                                                                                                                                                                                                                                                                                                                                                                                           |
| NAFL                   | YES | NO  | ICD-10     | K76.0                                                                                                                                                                                                                                                                                                                                                                                                                                                                                                                                                                                                                                                                                                                     |
| Hypertension           | YES | YES | ICD-10     | I10, I11, I11.0, I11.9, I12, I12.0, I12.9, I13, I13.0, I13.1, I13.10, I13.11, I13.2, I15, I15.0, I15.1, I15.2, I15.8, I15.9, I16, I16.0, I16.1, I16.9, O10, O10.0, O10.01, O10.011, O10.012, O10.013, O10.019, O10.02, O10.03, O10.1, O10.11, O10.111, O10.112, O10.113, O10.119, O10.12, O10.13, O10.2, O10.21, O10.211, O10.212, O10.213, O10.219, O10.22, O10.23, O10.3, O10.31, O10.311, O10.312, O10.313, O10.319, O10.32, O10.33, O10.4, O10.41, O10.411, O10.412, O10.413, O10.419, O10.42, O10.43, O10.9, O10.91, O10.911, O10.912, O10.913, O10.919, O10.92, O10.93, O11, O11.1, O11.2, O11.3, O11.4, O11.5, O11.9, O13, O13.1, O13.2, O13.3, O13.4, O13.5, O13.9, O16, O16.1, O16.2, O16.3, O16.4, O16.5, O16.9 |
| Cardiomyopathy         | NO  | YES | ICD-10     | I42, I42.0, I42.1, I42.2, I42.3, I42.4, I42.5, I42.7, I42.8, I42.9, I43, O90.3                                                                                                                                                                                                                                                                                                                                                                                                                                                                                                                                                                                                                                            |
| Cardiovascular Disease | NO  | YES | ICD-10     | I24.0, I25.10, I25.3, I25.41, I25.42, I25.5, I25.6, I25.8, I25.81, I25.810, I25.811, I25.812, I25.82, I25.83, I25.84, I25.89                                                                                                                                                                                                                                                                                                                                                                                                                                                                                                                                                                                              |
| Type 1 Diabetes        | YES | YES | ICD-10     | E10, E10.1, E10.10, E10.11, E10.2, E10.21, E10.22, E10.29, E10.3, E10.31, E10.311,                                                                                                                                                                                                                                                                                                                                                                                                                                                                                                                                                                                                                                        |

|                           |     |     |        |                                                                                                                                                                                                                                                                                                                                                                                                                                                                                                                                                                                                                                                                                                                                                                                                                                                                                                                                                                                                                                                                                    |
|---------------------------|-----|-----|--------|------------------------------------------------------------------------------------------------------------------------------------------------------------------------------------------------------------------------------------------------------------------------------------------------------------------------------------------------------------------------------------------------------------------------------------------------------------------------------------------------------------------------------------------------------------------------------------------------------------------------------------------------------------------------------------------------------------------------------------------------------------------------------------------------------------------------------------------------------------------------------------------------------------------------------------------------------------------------------------------------------------------------------------------------------------------------------------|
|                           |     |     |        | E10.319, E10.32, E10.321, E10.3211, E10.3212, E10.3213, E10.3219, E10.329, E10.3291, E10.3292, E10.3293, E10.3299, E10.33, E10.331, E10.3311, E10.3312, E10.3313, E10.3319, E10.339, E10.3391, E10.3392, E10.3393, E10.3399, E10.34, E10.341, E10.3411, E10.3412, E10.3413, E10.3419, E10.349, E10.3491, E10.3492, E10.3493, E10.3499, E10.35, E10.351, E10.3511, E10.3512, E10.3513, E10.3519, E10.352, E10.3521, E10.3522, E10.3523, E10.3529, E10.353, E10.3531, E10.3532, E10.3533, E10.3539, E10.354, E10.3541, E10.3542, E10.3543, E10.3549, E10.355, E10.3551, E10.3552, E10.3553, E10.3559, E10.359, E10.3591, E10.3592, E10.3593, E10.3599, E10.36, E10.37, E10.37X1, E10.37X2, E10.37X3, E10.37X9, E10.39, E10.4, E10.40, E10.41, E10.42, E10.43, E10.44, E10.49, E10.5, E10.51, E10.52, E10.59, E10.6, E10.61, E10.610, E10.618, E10.62, E10.620, E10.621, E10.622, E10.628, E10.63, E10.630, E10.638, E10.64, E10.641, E10.649, E10.65, E10.69, E10.8, E10.9                                                                                                           |
| Type 2 Diabetes           | YES | YES | ICD-10 | E11, E11.0, E11.00, E11.01, E11.1, E11.10, E11.11, E11.2, E11.21, E11.22, E11.29, E11.3, E11.31, E11.311, E11.319, E11.32, E11.321, E11.3211, E11.3212, E11.3213, E11.3219, E11.329, E11.3291, E11.3292, E11.3293, E11.3299, E11.33, E11.331, E11.3311, E11.3312, E11.3313, E11.3319, E11.339, E11.3391, E11.3392, E11.3393, E11.3399, E11.34, E11.341, E11.3411, E11.3412, E11.3413, E11.3419, E11.349, E11.3491, E11.3492, E11.3493, E11.3499, E11.35, E11.351, E11.3511, E11.3512, E11.3513, E11.3519, E11.352, E11.3521, E11.3522, E11.3523, E11.3529, E11.353, E11.3531, E11.3532, E11.3533, E11.3539, E11.354, E11.3541, E11.3542, E11.3543, E11.3549, E11.355, E11.3551, E11.3552, E11.3553, E11.3559, E11.359, E11.3591, E11.3592, E11.3593, E11.3599, E11.36, E11.37, E11.37X1, E11.37X2, E11.37X3, E11.37X9, E11.39, E11.4, E11.40, E11.41, E11.42, E11.43, E11.44, E11.49, E11.5, E11.51, E11.52, E11.59, E11.6, E11.61, E11.610, E11.618, E11.62, E11.620, E11.621, E11.622, E11.628, E11.63, E11.630, E11.638, E11.64, E11.641, E11.649, E11.65, E11.69, E11.8, E11.9 |
| Polycystic Ovary Syndrome | YES | YES | ICD-10 | E28.2                                                                                                                                                                                                                                                                                                                                                                                                                                                                                                                                                                                                                                                                                                                                                                                                                                                                                                                                                                                                                                                                              |
| Obesity                   | YES | YES | ICD-10 | E66, E66.0, E66.01, E66.09, E66.1, E66.2, E66.3, E66.8, E66.9, K95, K95.0, K95.01,                                                                                                                                                                                                                                                                                                                                                                                                                                                                                                                                                                                                                                                                                                                                                                                                                                                                                                                                                                                                 |

|                         |     |     |        |                                                                                                                                                                                                                                                                                                                                                                                                                                                                                                                                                                                                                                                                                                                                                                                                                                                                                                                                                                                                                                                                                                                                                                                                                                                                                                                                                                                                                                                                                                                                                                                                                                                    |
|-------------------------|-----|-----|--------|----------------------------------------------------------------------------------------------------------------------------------------------------------------------------------------------------------------------------------------------------------------------------------------------------------------------------------------------------------------------------------------------------------------------------------------------------------------------------------------------------------------------------------------------------------------------------------------------------------------------------------------------------------------------------------------------------------------------------------------------------------------------------------------------------------------------------------------------------------------------------------------------------------------------------------------------------------------------------------------------------------------------------------------------------------------------------------------------------------------------------------------------------------------------------------------------------------------------------------------------------------------------------------------------------------------------------------------------------------------------------------------------------------------------------------------------------------------------------------------------------------------------------------------------------------------------------------------------------------------------------------------------------|
|                         |     |     |        | K95.09, K95.8, K95.81, K95.89, O99.21, O99.210, O99.211, O99.212, O99.213, O99.214, O99.215, O99.840, O99.841, O99.842, O99.843, O99.844, O99.845, Z46.51, Z46.59, Z68.25, Z68.26, Z68.27, Z68.28, Z68.29, Z68.3, Z68.30, Z68.31, Z68.32, Z68.33, Z68.34, Z68.35, Z68.36, Z68.37, Z68.38, Z68.39, Z68.4, Z68.41, Z68.42, Z68.43, Z68.44, Z68.45, Z68.54, Z98.84                                                                                                                                                                                                                                                                                                                                                                                                                                                                                                                                                                                                                                                                                                                                                                                                                                                                                                                                                                                                                                                                                                                                                                                                                                                                                    |
| Hyperlipidemia          | YES | YES | ICD-10 | E78.0, E78.00, E78.01, E78.1, E78.2, E78.3, E78.4, E78.41, E78.49, E78.5                                                                                                                                                                                                                                                                                                                                                                                                                                                                                                                                                                                                                                                                                                                                                                                                                                                                                                                                                                                                                                                                                                                                                                                                                                                                                                                                                                                                                                                                                                                                                                           |
| Metabolic Syndrome      | YES | YES | ICD-10 | E88.81                                                                                                                                                                                                                                                                                                                                                                                                                                                                                                                                                                                                                                                                                                                                                                                                                                                                                                                                                                                                                                                                                                                                                                                                                                                                                                                                                                                                                                                                                                                                                                                                                                             |
| Kidney Failure          | YES | YES | ICD-10 | N17, N17.0, N17.1, N17.2, N17.8, N17.9, N19, O90.4, Z91.15, Z99.2                                                                                                                                                                                                                                                                                                                                                                                                                                                                                                                                                                                                                                                                                                                                                                                                                                                                                                                                                                                                                                                                                                                                                                                                                                                                                                                                                                                                                                                                                                                                                                                  |
| Depression              | YES | NO  | ICD-10 | F32, F32.0, F32.1, F32.2, F32.3, F32.4, F32.5, F32.8, F32.81, F32.89, F32.9, F33, F33.0, F33.1, F33.2, F33.3, F33.4, F33.40, F33.41, F33.42, F33.8, F33.9, F34.1, F43.23, F53.0                                                                                                                                                                                                                                                                                                                                                                                                                                                                                                                                                                                                                                                                                                                                                                                                                                                                                                                                                                                                                                                                                                                                                                                                                                                                                                                                                                                                                                                                    |
| Cerebrovascular Disease | YES | YES | ICD-10 | G45, G45.0, G45.1, G45.2, G45.3, G45.4, G45.8, G45.9, I61, I61.0, I61.1, I61.2, I61.3, I61.4, I61.5, I61.6, I61.8, I61.9, I62, I62.0, I62.00, I62.01, I62.02, I62.03, I62.1, I62.9, I63, I63.0, I63.00, I63.01, I63.011, I63.012, I63.013, I63.019, I63.02, I63.03, I63.031, I63.032, I63.033, I63.039, I63.09, I63.1, I63.10, I63.11, I63.111, I63.112, I63.113, I63.119, I63.12, I63.13, I63.131, I63.132, I63.133, I63.139, I63.19, I63.2, I63.20, I63.21, I63.211, I63.212, I63.213, I63.219, I63.22, I63.23, I63.231, I63.232, I63.233, I63.239, I63.29, I63.3, I63.30, I63.31, I63.311, I63.312, I63.313, I63.319, I63.32, I63.321, I63.322, I63.323, I63.329, I63.33, I63.331, I63.332, I63.333, I63.339, I63.34, I63.341, I63.342, I63.343, I63.349, I63.39, I63.4, I63.40, I63.41, I63.411, I63.412, I63.413, I63.419, I63.42, I63.421, I63.422, I63.423, I63.429, I63.43, I63.431, I63.432, I63.433, I63.439, I63.44, I63.441, I63.442, I63.443, I63.449, I63.49, I63.5, I63.50, I63.51, I63.511, I63.512, I63.513, I63.519, I63.52, I63.521, I63.522, I63.523, I63.529, I63.53, I63.531, I63.532, I63.533, I63.539, I63.54, I63.541, I63.542, I63.543, I63.549, I63.59, I63.6, I63.8, I63.81, I63.89, I63.9, I65, I65.0, I65.01, I65.02, I65.03, I65.09, I65.1, I65.2, I65.21, I65.22, I65.23, I65.29, I65.8, I65.9, I66, I66.0, I66.01, I66.02, I66.03, I66.09, I66.1, I66.11, I66.12, I66.13, I66.19, I66.2, I66.21, I66.22, I66.23, I66.29, I66.3, I66.8, I66.9, I67, I67.0, I67.1, I67.2, I67.3, I67.4, I67.5, I67.6, I67.7, I67.8, I67.81, I67.82, I67.83, I67.84, I67.841, I67.848, I67.85, I67.850, I67.858, I67.89, I67.9, I68, |

|  |  |  |  |                                                                                                                                                                                                                                                                                                                                                                                                                                                                                                                                                                                                                                                                                                                                                                                                                                                                                                                                                                                                                                                                                                                                                                                                                                                                                                                                                                                                                                                                                                                                                                                                                                                                                                                                                                                                                                                                                                                                                                                                                                                                                                                                                                                                                                                                                                                                                                                                                                                                                                                                                                      |
|--|--|--|--|----------------------------------------------------------------------------------------------------------------------------------------------------------------------------------------------------------------------------------------------------------------------------------------------------------------------------------------------------------------------------------------------------------------------------------------------------------------------------------------------------------------------------------------------------------------------------------------------------------------------------------------------------------------------------------------------------------------------------------------------------------------------------------------------------------------------------------------------------------------------------------------------------------------------------------------------------------------------------------------------------------------------------------------------------------------------------------------------------------------------------------------------------------------------------------------------------------------------------------------------------------------------------------------------------------------------------------------------------------------------------------------------------------------------------------------------------------------------------------------------------------------------------------------------------------------------------------------------------------------------------------------------------------------------------------------------------------------------------------------------------------------------------------------------------------------------------------------------------------------------------------------------------------------------------------------------------------------------------------------------------------------------------------------------------------------------------------------------------------------------------------------------------------------------------------------------------------------------------------------------------------------------------------------------------------------------------------------------------------------------------------------------------------------------------------------------------------------------------------------------------------------------------------------------------------------------|
|  |  |  |  | I68.0, I68.2, I68.8, I69, I69.0, I69.00, I69.01, I69.010, I69.011, I69.012, I69.013, I69.014, I69.015, I69.018, I69.019, I69.02, I69.020, I69.021, I69.022, I69.023, I69.028, I69.03, I69.031, I69.032, I69.033, I69.034, I69.039, I69.04, I69.041, I69.042, I69.043, I69.044, I69.049, I69.05, I69.051, I69.052, I69.053, I69.054, I69.059, I69.06, I69.061, I69.062, I69.063, I69.064, I69.065, I69.069, I69.09, I69.090, I69.091, I69.092, I69.093, I69.098, I69.1, I69.10, I69.11, I69.110, I69.111, I69.112, I69.113, I69.114, I69.115, I69.118, I69.119, I69.12, I69.120, I69.121, I69.122, I69.123, I69.128, I69.13, I69.131, I69.132, I69.133, I69.134, I69.139, I69.14, I69.141, I69.142, I69.143, I69.144, I69.149, I69.15, I69.151, I69.152, I69.153, I69.154, I69.159, I69.16, I69.161, I69.162, I69.163, I69.164, I69.165, I69.169, I69.19, I69.190, I69.191, I69.192, I69.193, I69.198, I69.2, I69.20, I69.21, I69.210, I69.211, I69.212, I69.213, I69.214, I69.215, I69.218, I69.219, I69.22, I69.220, I69.221, I69.222, I69.223, I69.228, I69.23, I69.231, I69.232, I69.233, I69.234, I69.239, I69.24, I69.241, I69.242, I69.243, I69.244, I69.249, I69.25, I69.251, I69.252, I69.253, I69.254, I69.259, I69.26, I69.261, I69.262, I69.263, I69.264, I69.265, I69.269, I69.29, I69.290, I69.291, I69.292, I69.293, I69.298, I69.3, I69.30, I69.31, I69.310, I69.311, I69.312, I69.313, I69.314, I69.315, I69.318, I69.319, I69.32, I69.320, I69.321, I69.322, I69.323, I69.328, I69.33, I69.331, I69.332, I69.333, I69.334, I69.339, I69.34, I69.341, I69.342, I69.343, I69.344, I69.349, I69.35, I69.351, I69.352, I69.353, I69.354, I69.359, I69.36, I69.361, I69.362, I69.363, I69.364, I69.365, I69.369, I69.39, I69.390, I69.391, I69.392, I69.393, I69.398, I69.8, I69.80, I69.81, I69.810, I69.811, I69.812, I69.813, I69.814, I69.815, I69.818, I69.819, I69.82, I69.820, I69.821, I69.822, I69.823, I69.828, I69.83, I69.831, I69.832, I69.833, I69.834, I69.839, I69.84, I69.841, I69.842, I69.843, I69.844, I69.849, I69.85, I69.851, I69.852, I69.853, I69.854, I69.859, I69.86, I69.861, I69.862, I69.863, I69.864, I69.865, I69.869, I69.89, I69.890, I69.891, I69.892, I69.893, I69.898, I69.9, I69.90, I69.91, I69.910, I69.911, I69.912, I69.913, I69.914, I69.915, I69.918, I69.919, I69.92, I69.920, I69.921, I69.922, I69.923, I69.928, I69.93, I69.931, I69.932, I69.933, I69.934, I69.939, I69.94, I69.941, I69.942, I69.943, I69.944, I69.949, I69.95, I69.951, I69.952, I69.953, I69.954, I69.959, I69.96, I69.961, I69.962, |
|--|--|--|--|----------------------------------------------------------------------------------------------------------------------------------------------------------------------------------------------------------------------------------------------------------------------------------------------------------------------------------------------------------------------------------------------------------------------------------------------------------------------------------------------------------------------------------------------------------------------------------------------------------------------------------------------------------------------------------------------------------------------------------------------------------------------------------------------------------------------------------------------------------------------------------------------------------------------------------------------------------------------------------------------------------------------------------------------------------------------------------------------------------------------------------------------------------------------------------------------------------------------------------------------------------------------------------------------------------------------------------------------------------------------------------------------------------------------------------------------------------------------------------------------------------------------------------------------------------------------------------------------------------------------------------------------------------------------------------------------------------------------------------------------------------------------------------------------------------------------------------------------------------------------------------------------------------------------------------------------------------------------------------------------------------------------------------------------------------------------------------------------------------------------------------------------------------------------------------------------------------------------------------------------------------------------------------------------------------------------------------------------------------------------------------------------------------------------------------------------------------------------------------------------------------------------------------------------------------------------|

|                         |     |     |        |                                                                                                                                                                                                                                                                                                                                                                                                                                                                                                                                                                              |
|-------------------------|-----|-----|--------|------------------------------------------------------------------------------------------------------------------------------------------------------------------------------------------------------------------------------------------------------------------------------------------------------------------------------------------------------------------------------------------------------------------------------------------------------------------------------------------------------------------------------------------------------------------------------|
|                         |     |     |        | I69.963, I69.964, I69.965, I69.969, I69.99, I69.990, I69.991, I69.992, I69.993, I69.998                                                                                                                                                                                                                                                                                                                                                                                                                                                                                      |
| Sleep Apnea Other       | YES | YES | ICD-10 | G47.3, G47.30, G47.31, G47.32, G47.34, G47.35, G47.36, G47.37, G47.39                                                                                                                                                                                                                                                                                                                                                                                                                                                                                                        |
| Sleep Apnea Obstructive | YES | YES | ICD-10 | G47.33                                                                                                                                                                                                                                                                                                                                                                                                                                                                                                                                                                       |
| Smoking                 | YES | YES | ICD-10 | F17.20, F17.200, F17.201, F17.203, F17.208, F17.209, F17.21, F17.210, F17.211, F17.213, F17.218, F17.219, F17.29, F17.290, F17.291, F17.293, F17.298, F17.299, O99.33, O99.330, O99.331, O99.332, O99.333, O99.334, O99.335, T65.22, T65.221, T65.221A, T65.221D, T65.221S, T65.222, T65.222A, T65.222D, T65.222S, T65.223, T65.223A, T65.223D, T65.223S, T65.224, T65.224A, T65.224D, T65.224S, T65.29, T65.291, T65.291A, T65.291D, T65.291S, T65.292, T65.292A, T65.292D, T65.292S, T65.293, T65.293A, T65.293D, T65.293S, T65.294, T65.294A, T65.294D, T65.294S, Z87.891 |
| Myocardial Infarction   | YES | YES | ICD-10 | I21, I21.0, I21.01, I21.02, I21.09, I21.1, I21.11, I21.19, I21.2, I21.21, I21.29, I21.3, I21.4, I21.9, I21.A, I21.A1, I21.A9, I22, I22.0, I22.1, I22.2, I22.8, I22.9, I23, I23.0, I23.1, I23.2, I23.3, I23.4, I23.5, I23.6, I23.7, I23.8, I25.2                                                                                                                                                                                                                                                                                                                              |
| Hepatomegaly            | YES | YES | ICD-10 | R16.0, R16.2                                                                                                                                                                                                                                                                                                                                                                                                                                                                                                                                                                 |
| Chronic Kidney Disease  | YES | YES | ICD-10 | N18, N18.1, N18.2, N18.3, N18.4, N18.5, N18.6, N18.9                                                                                                                                                                                                                                                                                                                                                                                                                                                                                                                         |
| Edema                   | YES | YES | ICD-10 | O12, O12.0, O12.00, O12.01, O12.02, O12.03, O12.04, O12.05, O12.1, O12.10, O12.11, O12.12, O12.13, O12.14, O12.15, O12.2, O12.20, O12.21, O12.22, O12.23, O12.24, O12.25, R60, R60.0, R60.1, R60.9                                                                                                                                                                                                                                                                                                                                                                           |
| Atrial Fibrillation     | YES | YES | ICD-10 | I48.0, I48.1, I48.11, I48.19, I48.2, I48.20, I48.21, I48.91                                                                                                                                                                                                                                                                                                                                                                                                                                                                                                                  |
| Abdominal Pain          | YES | YES | ICD-10 | R10, R10.0, R10.1, R10.10, R10.11, R10.12, R10.13, R10.2, R10.3, R10.30, R10.31, R10.32, R10.33, R10.8, R10.81, R10.811, R10.812, R10.813, R10.814, R10.815, R10.816, R10.817, R10.819, R10.82, R10.821, R10.822, R10.823, R10.824, R10.825, R10.826, R10.827, R10.829, R10.84, R10.9                                                                                                                                                                                                                                                                                        |
| Bloating                | YES | NO  | ICD-10 | R14.0                                                                                                                                                                                                                                                                                                                                                                                                                                                                                                                                                                        |
| Anemia                  | YES | YES | ICD-10 | D50, D50.0, D50.1, D50.8, D50.9, D51, D51.0, D51.1, D51.2, D51.3, D51.8, D51.9, D52, D52.0, D52.1, D52.8, D52.9, D53, D53.0, D53.1, D53.2, D53.8, D53.9, D55, D55.0, D55.1, D55.2, D55.3, D55.8, D55.9, D56, D56.0, D56.1, D56.2, D56.3, D56.4, D56.5, D56.8, D56.9, D57, D57.0, D57.00, D57.01, D57.02, D57.1, D57.2, D57.20, D57.21, D57.211, D57.212, D57.219, D57.3, D57.4, D57.40, D57.41, Det57.411,                                                                                                                                                                   |

|                             |     |     |        |                                                                                                                                                                                                                                                                                                                                                                                                                                                                                                                                                                                                                                                                                                                                                                                                                                                                                                                                                                                                                                                                                                                                                                                                                                                                                                                                                                                                                                                                                                          |
|-----------------------------|-----|-----|--------|----------------------------------------------------------------------------------------------------------------------------------------------------------------------------------------------------------------------------------------------------------------------------------------------------------------------------------------------------------------------------------------------------------------------------------------------------------------------------------------------------------------------------------------------------------------------------------------------------------------------------------------------------------------------------------------------------------------------------------------------------------------------------------------------------------------------------------------------------------------------------------------------------------------------------------------------------------------------------------------------------------------------------------------------------------------------------------------------------------------------------------------------------------------------------------------------------------------------------------------------------------------------------------------------------------------------------------------------------------------------------------------------------------------------------------------------------------------------------------------------------------|
|                             |     |     |        | D57.412, D57.419, D57.8, D57.80, D57.81, D57.811, D57.812, D57.819, D58, D58.0, D58.1, D58.2, D58.8, D58.9, D59, D59.0, D59.1, D59.2, D59.3, D59.4, D59.5, D59.6, D59.8, D59.9, D60, D60.0, D60.1, D60.8, D60.9, D61, D61.0, D61.01, D61.09, D61.1, D61.2, D61.3, D61.8, D61.81, D61.810, D61.811, D61.818, D61.82, D61.89, D61.9, D62, D63, D63.0, D63.1, D63.8, D64, D64.0, D64.1, D64.2, D64.3, D64.4, D64.8, D64.81, D64.89, D64.9, O90.81, O99.0, O99.01, O99.011, O99.012, O99.013, O99.019, O99.02, O99.03                                                                                                                                                                                                                                                                                                                                                                                                                                                                                                                                                                                                                                                                                                                                                                                                                                                                                                                                                                                        |
| Splenomegaly                | YES | YES | ICD-10 | R16.1                                                                                                                                                                                                                                                                                                                                                                                                                                                                                                                                                                                                                                                                                                                                                                                                                                                                                                                                                                                                                                                                                                                                                                                                                                                                                                                                                                                                                                                                                                    |
| Malaise Fatigue             | YES | YES | ICD-10 | R53, R53.1, R53.2, R53.8, R53.81, R53.82, R53.83                                                                                                                                                                                                                                                                                                                                                                                                                                                                                                                                                                                                                                                                                                                                                                                                                                                                                                                                                                                                                                                                                                                                                                                                                                                                                                                                                                                                                                                         |
| Abnormal Loss of Weight     | YES | YES | ICD-10 | R63.4                                                                                                                                                                                                                                                                                                                                                                                                                                                                                                                                                                                                                                                                                                                                                                                                                                                                                                                                                                                                                                                                                                                                                                                                                                                                                                                                                                                                                                                                                                    |
| Liver Failure               | YES | YES | ICD-10 | K72, K72.0, K72.00, K72.01, K72.1, K72.10, K72.11, K72.9, K72.90, K72.91                                                                                                                                                                                                                                                                                                                                                                                                                                                                                                                                                                                                                                                                                                                                                                                                                                                                                                                                                                                                                                                                                                                                                                                                                                                                                                                                                                                                                                 |
| Hypothyroidism              | YES | YES | ICD-10 | E00, E00.0, E00.1, E00.2, E00.9, E02, E03, E03.0, E03.1, E03.2, E03.3, E03.4, E03.5, E03.8, E03.9, E89.0                                                                                                                                                                                                                                                                                                                                                                                                                                                                                                                                                                                                                                                                                                                                                                                                                                                                                                                                                                                                                                                                                                                                                                                                                                                                                                                                                                                                 |
| Peripheral Vascular Disease | YES | NO  | ICD-10 | I70.2, I70.20, I70.201, I70.202, I70.203, I70.208, I70.209, I70.21, I70.211, I70.212, I70.213, I70.218, I70.219, I70.22, I70.221, I70.222, I70.223, I70.228, I70.229, I70.23, I70.231, I70.232, I70.233, I70.234, I70.235, I70.238, I70.239, I70.24, I70.241, I70.242, I70.243, I70.244, I70.245, I70.248, I70.249, I70.25, I70.26, I70.261, I70.262, I70.263, I70.268, I70.269, I70.29, I70.291, I70.292, I70.293, I70.298, I70.299, I70.3, I70.30, I70.301, I70.302, I70.303, I70.308, I70.309, I70.31, I70.311, I70.312, I70.313, I70.318, I70.319, I70.32, I70.321, I70.322, I70.323, I70.328, I70.329, I70.33, I70.331, I70.332, I70.333, I70.334, I70.335, I70.338, I70.339, I70.34, I70.341, I70.342, I70.343, I70.344, I70.345, I70.348, I70.349, I70.35, I70.36, I70.361, I70.362, I70.363, I70.368, I70.369, I70.39, I70.391, I70.392, I70.393, I70.398, I70.399, I70.4, I70.40, I70.401, I70.402, I70.403, I70.408, I70.409, I70.41, I70.411, I70.412, I70.413, I70.418, I70.419, I70.42, I70.421, I70.422, I70.423, I70.428, I70.429, I70.43, I70.431, I70.432, I70.433, I70.434, I70.435, I70.438, I70.439, I70.44, I70.441, I70.442, I70.443, I70.444, I70.445, I70.448, I70.449, I70.45, I70.46, I70.461, I70.462, I70.463, I70.468, I70.469, I70.49, I70.491, I70.492, I70.493, I70.498, I70.499, I70.5, I70.50, I70.501, I70.502, I70.503, I70.508, I70.509, I70.51, I70.511, I70.512, I70.513, I70.518, I70.519, I70.52, I70.521, I70.522, I70.523, I70.528, I70.529, I70.53, I70.531, |

|                            |     |     |          | 170.532, 170.533, 170.534, 170.535, 170.538, 170.539, 170.54, 170.541, 170.542, 170.543, 170.544, 170.545, 170.548, 170.549, 170.55, 170.56, 170.561, 170.562, 170.563, 170.568, 170.569, 170.59, 170.591, 170.592, 170.593, 170.598, 170.599, 170.6, 170.60, 170.601, 170.602, 170.603, 170.608, 170.609, 170.61, 170.611, 170.612, 170.613, 170.618, 170.619, 170.62, 170.621, 170.622, 170.623, 170.628, 170.629, 170.63, 170.631, 170.632, 170.633, 170.634, 170.635, 170.638, 170.639, 170.64, 170.641, 170.642, 170.643, 170.644, 170.645, 170.648, 170.649, 170.65, 170.66, 170.661, 170.662, 170.663, 170.668, 170.669, 170.69, 170.691, 170.692, 170.693, 170.698, 170.699, 170.7, 170.70, 170.701, 170.702, 170.703, 170.708, 170.709, 170.71, 170.711, 170.712, 170.713, 170.718, 170.719, 170.72, 170.721, 170.722, 170.723, 170.728, 170.729, 170.73, 170.731, 170.732, 170.733, 170.734, 170.735, 170.738, 170.739, 170.74, 170.741, 170.742, 170.743, 170.744, 170.745, 170.748, 170.749, 170.75, 170.76, 170.761, 170.762, 170.763, 170.768, 170.769, 170.79, 170.791, 170.792, 170.793, 170.798, 170.799, 170.8, 170.9, 170.90, 170.91, 170.92, 173, 173.0, 173.00, 173.01, 173.1, 173.8, 173.81, 173.89, 173.9, 175.0, 175.01, 175.011, 175.012, 175.013, 175.019, 175.02, 175.021, 175.022, 175.023, 175.029, 177.1, 177.72, 179.8 |
|----------------------------|-----|-----|----------|-------------------------------------------------------------------------------------------------------------------------------------------------------------------------------------------------------------------------------------------------------------------------------------------------------------------------------------------------------------------------------------------------------------------------------------------------------------------------------------------------------------------------------------------------------------------------------------------------------------------------------------------------------------------------------------------------------------------------------------------------------------------------------------------------------------------------------------------------------------------------------------------------------------------------------------------------------------------------------------------------------------------------------------------------------------------------------------------------------------------------------------------------------------------------------------------------------------------------------------------------------------------------------------------------------------------------------------------------------|
| Procedures                 |     |     |          |                                                                                                                                                                                                                                                                                                                                                                                                                                                                                                                                                                                                                                                                                                                                                                                                                                                                                                                                                                                                                                                                                                                                                                                                                                                                                                                                                       |
| Liver Panel                | YES | YES | CPT/HCPC | 0002M, 0003M, 80076                                                                                                                                                                                                                                                                                                                                                                                                                                                                                                                                                                                                                                                                                                                                                                                                                                                                                                                                                                                                                                                                                                                                                                                                                                                                                                                                   |
| Bariatric Surgery          | YES | YES | CPT/HCPC | 43644, 43645, 43770, 43771, 43772, 43773, 43774, 43775, 43842, 43843, 43845, 43846, 43847, 43848, 43886, 43887, 43888                                                                                                                                                                                                                                                                                                                                                                                                                                                                                                                                                                                                                                                                                                                                                                                                                                                                                                                                                                                                                                                                                                                                                                                                                                 |
| Liver Biopsy               | YES | YES | CPT/HCPC | 47000, 47001                                                                                                                                                                                                                                                                                                                                                                                                                                                                                                                                                                                                                                                                                                                                                                                                                                                                                                                                                                                                                                                                                                                                                                                                                                                                                                                                          |
| Abdominal Ultrasound       | YES | YES | CPT/HCPC | 76700, 76705                                                                                                                                                                                                                                                                                                                                                                                                                                                                                                                                                                                                                                                                                                                                                                                                                                                                                                                                                                                                                                                                                                                                                                                                                                                                                                                                          |
| Gamma Glutamyl Transferase | YES | YES | CPT/HCPC | 82977                                                                                                                                                                                                                                                                                                                                                                                                                                                                                                                                                                                                                                                                                                                                                                                                                                                                                                                                                                                                                                                                                                                                                                                                                                                                                                                                                 |
| Alanine Aminotransferase   | YES | YES | CPT/HCPC | 84460                                                                                                                                                                                                                                                                                                                                                                                                                                                                                                                                                                                                                                                                                                                                                                                                                                                                                                                                                                                                                                                                                                                                                                                                                                                                                                                                                 |
| Complete Blood Count       | YES | YES | CPT/HCPC | 85025, 85027                                                                                                                                                                                                                                                                                                                                                                                                                                                                                                                                                                                                                                                                                                                                                                                                                                                                                                                                                                                                                                                                                                                                                                                                                                                                                                                                          |
| Prothrombin Time           | YES | YES | CPT/HCPC | 85610                                                                                                                                                                                                                                                                                                                                                                                                                                                                                                                                                                                                                                                                                                                                                                                                                                                                                                                                                                                                                                                                                                                                                                                                                                                                                                                                                 |
| Liver Elastography         | YES | YES | CPT/HCPC | 91200                                                                                                                                                                                                                                                                                                                                                                                                                                                                                                                                                                                                                                                                                                                                                                                                                                                                                                                                                                                                                                                                                                                                                                                                                                                                                                                                                 |
| Lipid Panel                | YES | YES | CPT/HCPC | 0052U, 80061, 83719, 83721, 83722                                                                                                                                                                                                                                                                                                                                                                                                                                                                                                                                                                                                                                                                                                                                                                                                                                                                                                                                                                                                                                                                                                                                                                                                                                                                                                                     |

Supplementary Table 6. XGBoost Hyperparameters for the NAFL Inclusive and non-NAFL Models

| Modeling Parameters | NAFL Inclusive Model | Non-NAFL Model |
|---------------------|----------------------|----------------|
| Random State        | 42                   | 42             |
| Max Depth           | 6                    | 6              |
| Gamma               | 0                    | 0              |

|               |     |     |
|---------------|-----|-----|
| n Estimators  | 200 | 200 |
| Learning Rate | 0.1 | 0.1 |

| Supplementary Table                                                               | Claim Code or Medication                                                                                                                                                                                                                                                                                                                                                                                                                                                                                                                                                                                                                                                                                                                                                                                                                                                                                                                                                                                                                                                           |
|-----------------------------------------------------------------------------------|------------------------------------------------------------------------------------------------------------------------------------------------------------------------------------------------------------------------------------------------------------------------------------------------------------------------------------------------------------------------------------------------------------------------------------------------------------------------------------------------------------------------------------------------------------------------------------------------------------------------------------------------------------------------------------------------------------------------------------------------------------------------------------------------------------------------------------------------------------------------------------------------------------------------------------------------------------------------------------------------------------------------------------------------------------------------------------|
| <b>7. List of NAFL and T2D Clinical Codes Used for Model Benchmarking. Source</b> |                                                                                                                                                                                                                                                                                                                                                                                                                                                                                                                                                                                                                                                                                                                                                                                                                                                                                                                                                                                                                                                                                    |
| <b>NAFL</b>                                                                       |                                                                                                                                                                                                                                                                                                                                                                                                                                                                                                                                                                                                                                                                                                                                                                                                                                                                                                                                                                                                                                                                                    |
| ICD-10                                                                            | K76.0                                                                                                                                                                                                                                                                                                                                                                                                                                                                                                                                                                                                                                                                                                                                                                                                                                                                                                                                                                                                                                                                              |
| <b>T2D</b>                                                                        |                                                                                                                                                                                                                                                                                                                                                                                                                                                                                                                                                                                                                                                                                                                                                                                                                                                                                                                                                                                                                                                                                    |
| ICD-10                                                                            | E11, E11.0, E11.00, E11.01, E11.1, E11.10, E11.11, E11.2, E11.21, E11.22, E11.29, E11.3, E11.31, E11.311, E11.319, E11.32, E11.321, E11.3211, E11.3212, E11.3213, E11.3219, E11.329, E11.3291, E11.3292, E11.3293, E11.3299, E11.33, E11.331, E11.3311, E11.3312, E11.3313, E11.3319, E11.339, E11.3391, E11.3392, E11.3393, E11.3399, E11.34, E11.341, E11.3411, E11.3412, E11.3413, E11.3419, E11.349, E11.3491, E11.3492, E11.3493, E11.3499, E11.35, E11.351, E11.3511, E11.3512, E11.3513, E11.3519, E11.352, E11.3521, E11.3522, E11.3523, E11.3529, E11.353, E11.3531, E11.3532, E11.3533, E11.3539, E11.354, E11.3541, E11.3542, E11.3543, E11.3549, E11.355, E11.3551, E11.3552, E11.3553, E11.3559, E11.359, E11.3591, E11.3592, E11.3593, E11.3599, E11.36, E11.37, E11.37X1, E11.37X2, E11.37X3, E11.37X9, E11.39, E11.4, E11.40, E11.41, E11.42, E11.43, E11.44, E11.49, E11.5, E11.51, E11.52, E11.59, E11.6, E11.61, E11.610, E11.618, E11.62, E11.620, E11.621, E11.622, E11.628, E11.63, E11.630, E11.638, E11.64, E11.641, E11.649, E11.65, E11.69, E11.8, E11.9 |
| HCPC                                                                              | A4224, A4225, A4230, A4231, A4232, A9274, E0784, J1815, J1817, S5550, S5551, S5552, S5553, S5560, S5561, S5565, S5566, S5570, S5571, S8490, S9145, S9353                                                                                                                                                                                                                                                                                                                                                                                                                                                                                                                                                                                                                                                                                                                                                                                                                                                                                                                           |



|            |                                                                                                                                                                                                                                                                                                                                                                                                                                                                                                                                                                                                                                                                                                                                                                                                                                                                                                                                                                                                                                                                                                                                                                                                                                                                                                                                                                                                                                                                                                                                                                                                                                                                                                                                                                                                                                                                                                                                                                                                                                                                                                                                                                                                                                                                                                                                                                                                                                                                                                                                                       |
|------------|-------------------------------------------------------------------------------------------------------------------------------------------------------------------------------------------------------------------------------------------------------------------------------------------------------------------------------------------------------------------------------------------------------------------------------------------------------------------------------------------------------------------------------------------------------------------------------------------------------------------------------------------------------------------------------------------------------------------------------------------------------------------------------------------------------------------------------------------------------------------------------------------------------------------------------------------------------------------------------------------------------------------------------------------------------------------------------------------------------------------------------------------------------------------------------------------------------------------------------------------------------------------------------------------------------------------------------------------------------------------------------------------------------------------------------------------------------------------------------------------------------------------------------------------------------------------------------------------------------------------------------------------------------------------------------------------------------------------------------------------------------------------------------------------------------------------------------------------------------------------------------------------------------------------------------------------------------------------------------------------------------------------------------------------------------------------------------------------------------------------------------------------------------------------------------------------------------------------------------------------------------------------------------------------------------------------------------------------------------------------------------------------------------------------------------------------------------------------------------------------------------------------------------------------------------|
| Medication | <p>Byetta, Rybelsus, Trulicity, Victoza, Bydureon, Tanzeum, Bydureon Pen, Adlyxin, Adlyxin Starter Pack, Bydureon Bcise, Ozempic, Saxenda, Glipizide, Glimepiride, Jardiance, Metformin Hydrochloride E, Metformin Hydrochloride, Glipizide Er, Myxredlin, Pioglitazone Hydrochlorid, Pioglitazone HCl, Fiasp Penfill, Nateglinide, Glipizide/Metformin Hydro, Glyburide, Alogliptin, Segluromet, Insulin Lispro, Insulin Lispro Kwikpen, Qtern, Toujeo Solostar, Novolog Mix 70/30, Novolog Mix 70/30 Prefill, Admelog Solostar, Humalog Kwikpen, Novolog Penfill, Afrezza, Tresiba, Admelog, Novolin 70/30 Flexpen, Novolin 70/30 Flexpen Rel, Levemir, Humalog, Lantus Solostar, Novolog, Novolog Flexpen, Levemir Flextouch, Lantus, Glyburide/Metformin Hydro, Novolin 70/30, Humulin N, Novolin N, Novolin R, Glumetza, Toujeo Max Solostar, Xigduo Xr, Steglatro, Steglujan, Janumet Xr, Janumet, D-Care Dm2, Humalog Junior Kwikpen, Fiasp Flextouch, Fiasp, Pioglitazone HCl/Metformin, Synjardy Xr, Prandin, Januvia, Invokamet Xr, Basaglar Kwikpen, Xultophy 100/3.6, Soliqua 100/33, Miglitol, Jentadueto Xr, Glyburide/Metformin HCl, Humulin R U-500 Kwikpen, Repaglinide, Alogliptin/Pioglitazone, Alogliptin/Metformin HCl, Repaglinide/Metformin Hyd, Glyxambi, Glucotrol XI, Pioglitazone HCl-Glimepir, Synjardy, Tresiba Flextouch, Acarbose, Riomet, Onglyza, Kombiglyze Xr, Symlinpen 120, Symlinpen 60, Farxiga, Avandia, Glipizide XI, Invokamet, Levemir Flexpen, Metformin HCl, Humulin 70/30 Kwikpen, Humulin N Kwikpen, Metformin HCl Er, Glyburide Micronized, Invokana, Oseni, Nesina, Kazano, Juvisync, Novolin N Relion, Novolin R Relion, Novolin 70/30 Relion, Tolazamide, Jentadueto, Actos, Actoplus Met, Humalog Mix 75/25, Appformin, Appformin-D, Avandamet, Novolog Mix 70-30 Flexpen, Avandaryl, Tradjenta, Humulin R, Glipizide/Metformin HCl, Humulin 70/30, Cycloset, Humalog Mix 50/50 Pen, Humalog Mix 75/25 Pen, Humalog Mix 75/25 Kwikpen, Humalog Mix 50/50 Kwikpen, Precose, Actoplus Met Xr, Fortamet, Humalog Mix 50/50, Novolin 70-30, Apidra Solostar, Prandimet, Symlin, Glucovance, Humalog Pen, Humulin 50/50, Lantus for Opticlik, Duetact, Glyset, Amaryl, Apidra, Glucophage Xr, Metaglip, Starlix, Novolin R U-100, Chlorpropamide, Relion R, Relion N, Relion 70/30, Glucophage, Relion N Innolet, Relion 70/30 Innolet, Glycron, Diabeta, Tolinase, Glucotrol, Tolbutamide, Glynase, Novolin N U-100, Diabinese, Humulin R U-500 (Concentr, Humulin N U-100 Pen, Humulin 70/30 Pen</p> |
|------------|-------------------------------------------------------------------------------------------------------------------------------------------------------------------------------------------------------------------------------------------------------------------------------------------------------------------------------------------------------------------------------------------------------------------------------------------------------------------------------------------------------------------------------------------------------------------------------------------------------------------------------------------------------------------------------------------------------------------------------------------------------------------------------------------------------------------------------------------------------------------------------------------------------------------------------------------------------------------------------------------------------------------------------------------------------------------------------------------------------------------------------------------------------------------------------------------------------------------------------------------------------------------------------------------------------------------------------------------------------------------------------------------------------------------------------------------------------------------------------------------------------------------------------------------------------------------------------------------------------------------------------------------------------------------------------------------------------------------------------------------------------------------------------------------------------------------------------------------------------------------------------------------------------------------------------------------------------------------------------------------------------------------------------------------------------------------------------------------------------------------------------------------------------------------------------------------------------------------------------------------------------------------------------------------------------------------------------------------------------------------------------------------------------------------------------------------------------------------------------------------------------------------------------------------------------|

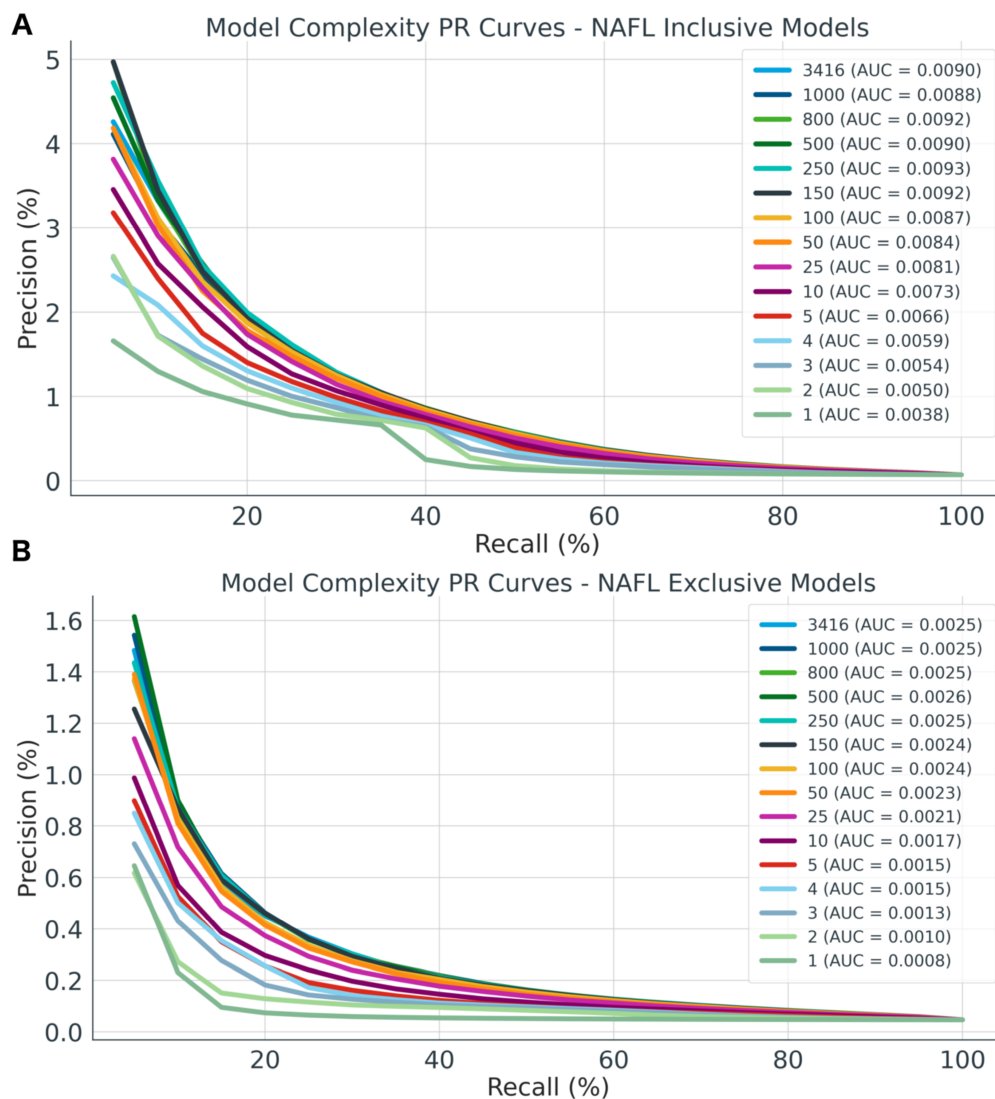

**Supplementary Figure 1. PR Curves for Recursive Feature Elimination.** Recursive feature elimination (RFE) was used to limit the number of clinical predictors for NAFL inclusive modeling (A) and non-NAFL modeling (B) while preserving model performance. Cross-sections 1-4 were used for model training and cross-section 6 was used for performance evaluation for each RFE iteration. Precision is scaled to the observed 6-month NASH incidence for each modeling cohort.

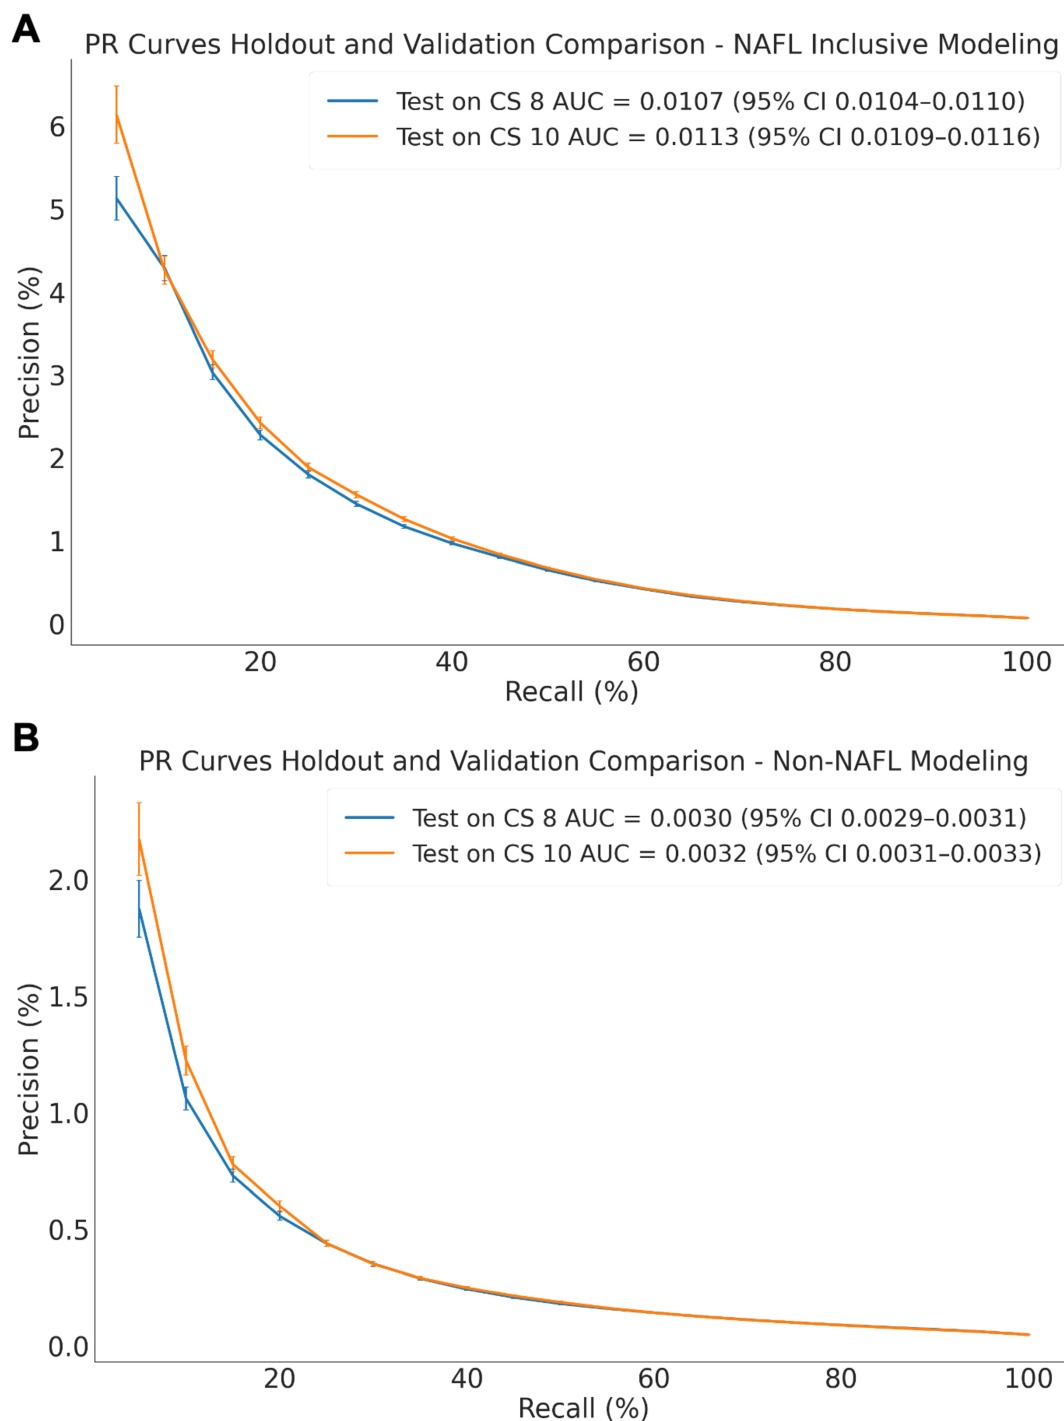

**Supplementary Figure 2. PR Curves for Holdout and Validation Sets.** Precision and recall curves for models trained on cross-sections 1-6 then tested on either the holdout validation set (cross-section 8) or the prospective scoring validation set (cross-section 10) for the NAFL inclusive (A) and Non-NAFL (B) models. Precision is scaled to the observed 6-month NASH incidence for each modeling cohort. CS: cross-section.

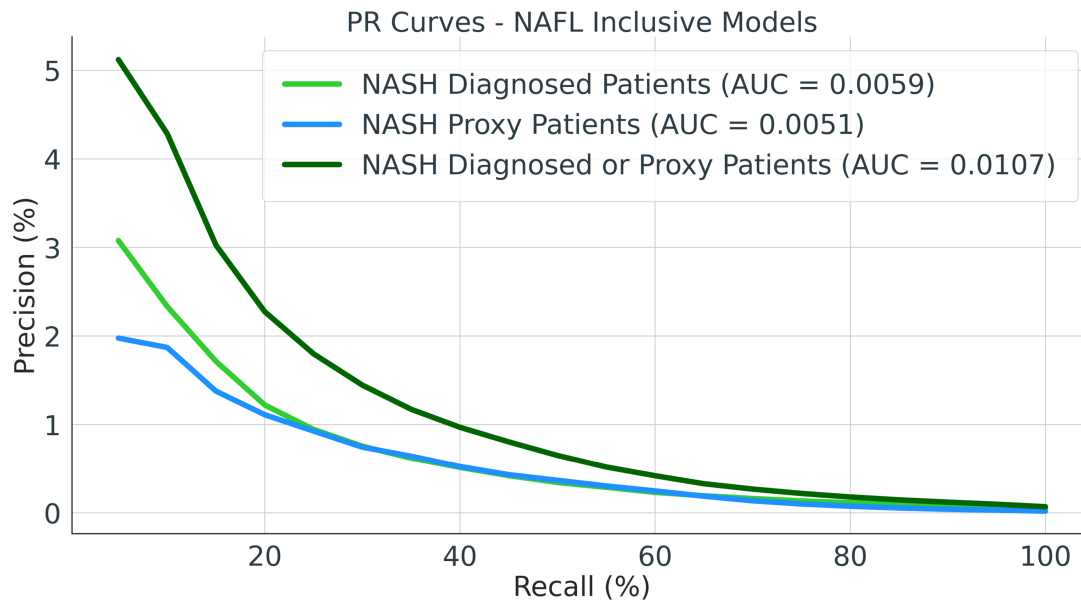

**Supplementary Figure 3. PR Curves for NASH Diagnosed versus NASH Proxy Patients. A)**

Precision and recall for NASH patients identified by an ICD-10 diagnosis code, NASH proxy criteria or by either criterion. Performance is for the KD and DD features NAFL inclusive model applied to the holdout validation set. Precision is scaled to the respective incidence of each NASH labeling criteria observed in claims per 6-months.
